# Supplementary material
Source: PubMed Central journal article supplement (PMC6628644)
Supplement: pnas.1908034116.sapp.pdf [file pnas.1908034116.sapp.pdf]

## Supplementary information

### **A Platinum(II) Molecular Hinge with Motions Visualized by Phosphorescence Changes**

Yeye Ai<sup>[a,b]</sup> Michael Ho-Yeung Chan,<sup>[b]</sup> Alan Kwun-Wa Chan,<sup>[b]</sup> Maggie Ng,<sup>[b]</sup>  
Yongguang Li,<sup>\*[a]</sup> Vivian Wing-Wah Yam<sup>\*[a,b]</sup>

*[a] Lehn Institute of Functional Materials, School of Chemistry, Sun Yat-Sen University, Guangzhou 510275, P. R. China*

*[b] Institute of Molecular Functional Materials [Areas of Excellence Scheme, University Grants Committee (Hong Kong)] and Department of Chemistry, The University of Hong Kong, Pokfulam Road, Hong Kong, P. R. China*

E-mail: liyongguang@mail.sysu.edu.cn; wwyam@hku.hk

## Material and Methods

The synthetic routes of **1–5** were shown in Scheme S1. Complex **6**, chloroplatinum(II) precursors **P-1** and **P-2**, compounds **C-1** and **C-6**, and 1,1'-(1,3-butadiyne-1,4-diyl)bis[2-ethynylbenzene] (**L'**) in Schemes S1 and S2 were synthesized according to the reported literatures (1–4). Compound **L1**, **L2** and **P-3** were synthesized according to Scheme S2.

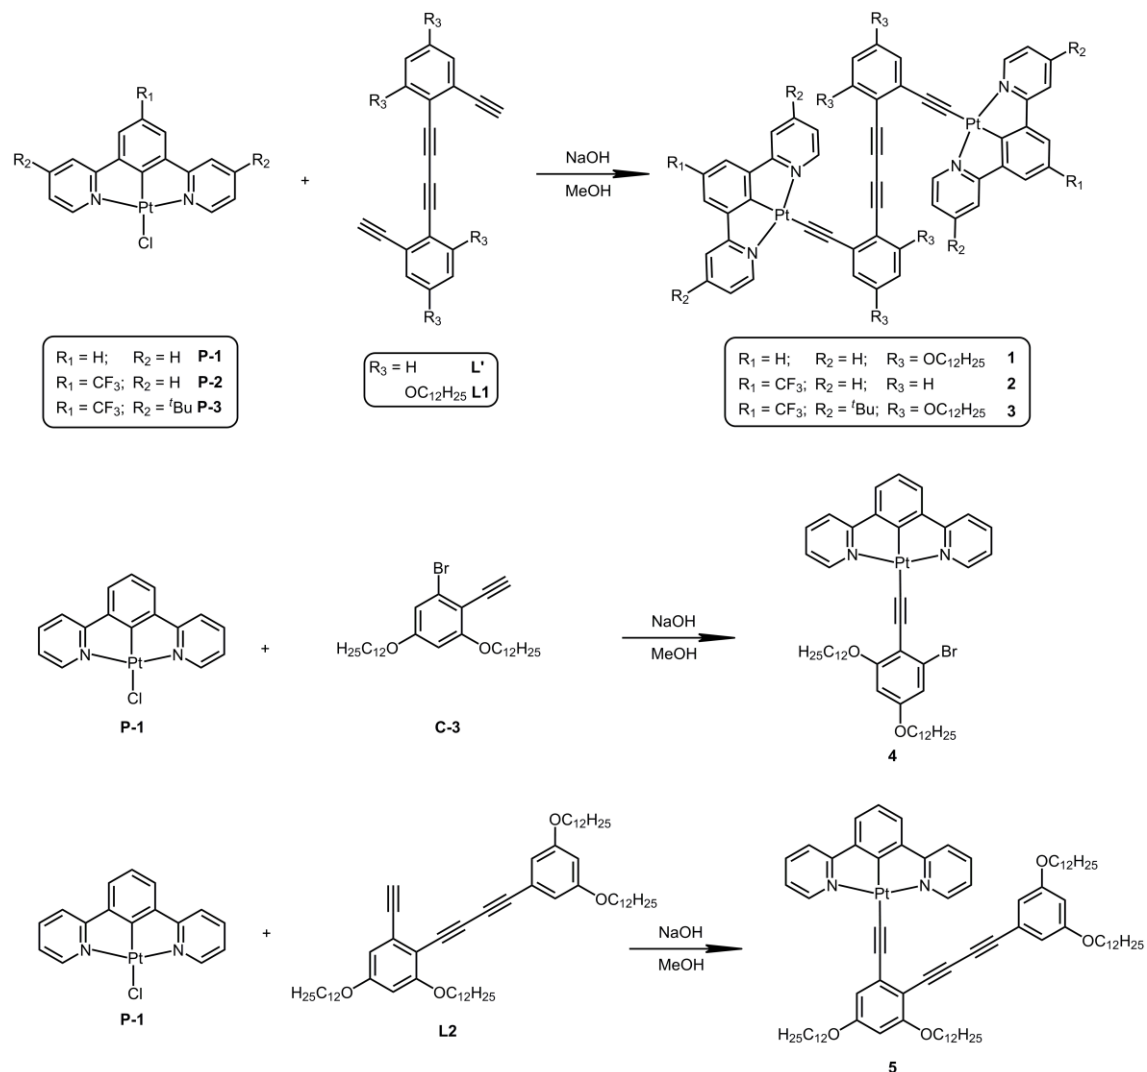

**Scheme S1.** Synthetic routes of **1–5**.

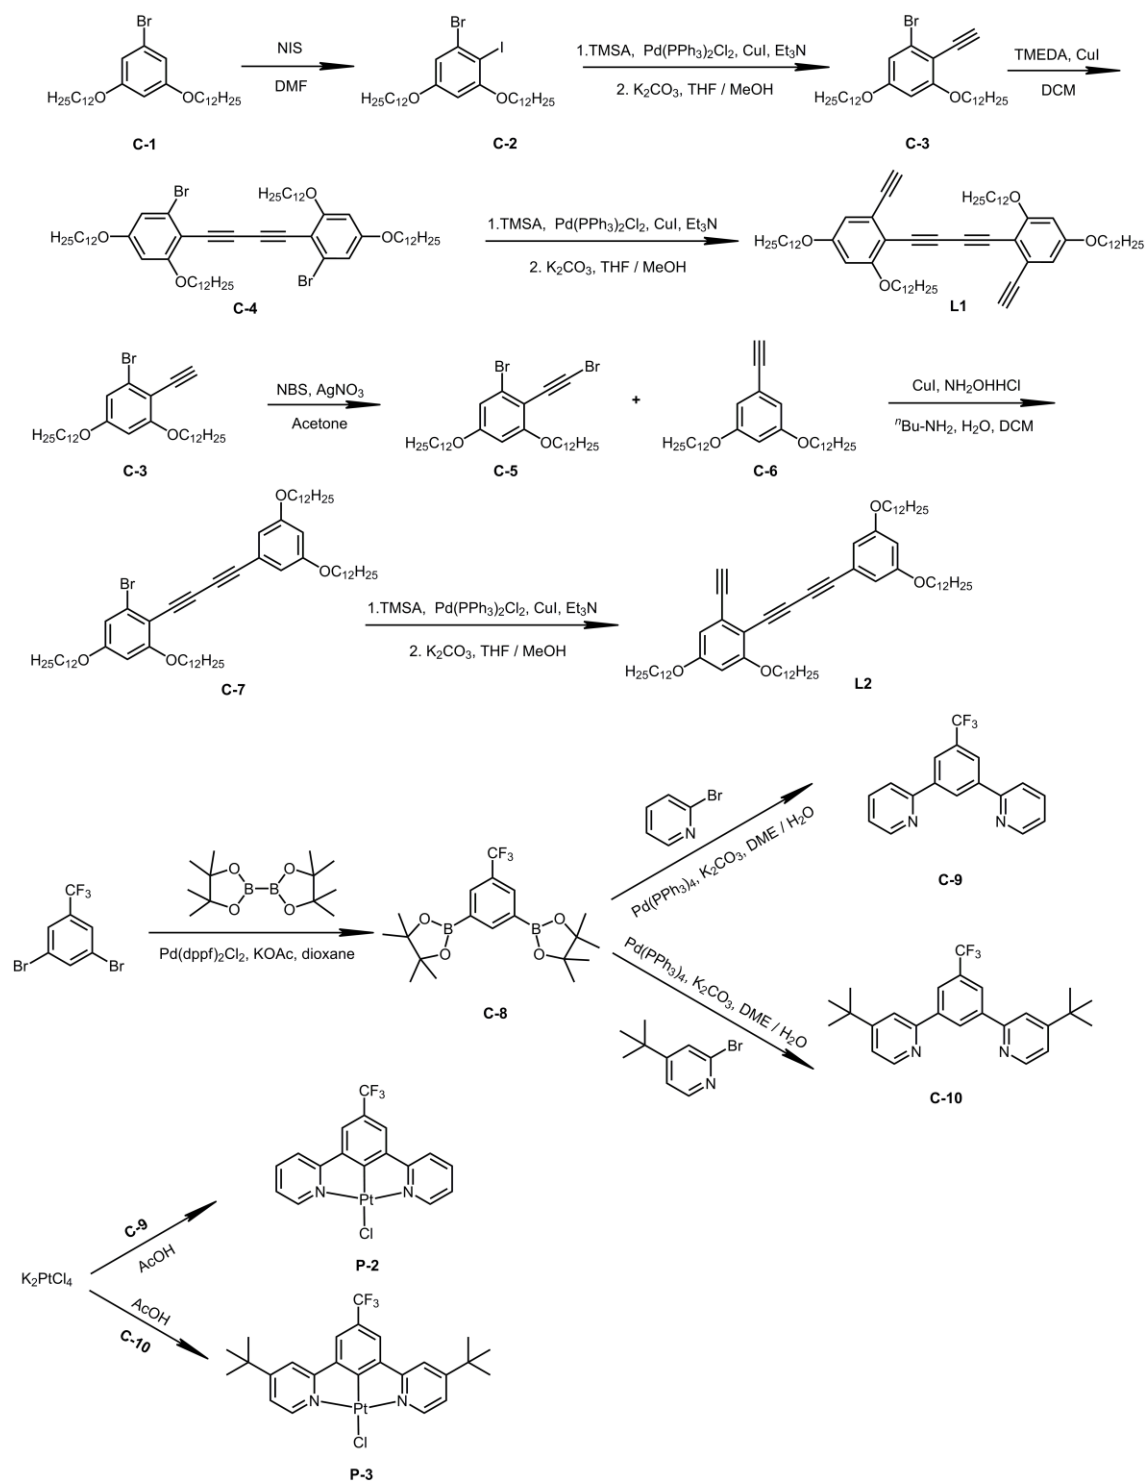

**Scheme S2.** Synthetic routes of ligands and chloroplatinum(II) precursors.

## Experimental Procedures

### Synthesis of alkynylplatinum(II) complexes

Synthesis of 1. A mixture of **L1** (30 mg, 0.030 mmol) and NaOH (6 mg, 0.15 mmol) in a methanol (50 mL) solution was stirred for 20 minutes at room temperature under nitrogen atmosphere. Subsequently, [(N<sup>^</sup>C<sup>^</sup>N)PtCl] (29 mg, 0.064 mmol) was added to the above reaction mixture. The mixture was stirred for 24 hours at room temperature. Slow precipitation with methanol (100 mL) in batches for 10 min afforded the pure product as a yellow solid. Yield: 43 mg, 0.023 mmol, 77 %; <sup>1</sup>H NMR (400 MHz, 298 K, CDCl<sub>3</sub>, relative to Me<sub>4</sub>Si,  $\delta$  / ppm): 0.85–0.90 (m, 12H, –CH<sub>3</sub>), 1.25–1.52 (m, 72H, –CH<sub>2</sub>–), 1.75–1.91 (m, 8H, –CH<sub>2</sub>–), 3.95–4.02 (m, 8H, –OCH<sub>2</sub>–), 6.28 (d,  $J$  = 2.1 Hz, 2H, phenyl), 6.59 (d,  $J$  = 2.1 Hz, 2H, phenyl), 6.71 (t,  $J$  = 7.6 Hz, 2H, phenyl), 6.96 (d,  $J$  = 7.6 Hz, 4H, phenyl), 7.26–7.32 (m, 8H, pyridyl), 7.71 (t,  $J$  = 8.4 Hz, 4H, pyridyl), 9.49 (d,  $J$  = 6.1 Hz, 4H, pyridyl); MS (MALDI):  $m/z$ : 1837.914 [ $M+H$ ]<sup>+</sup>; elemental analysis calcd (%) for C<sub>100</sub>H<sub>126</sub>N<sub>4</sub>O<sub>4</sub>Pt<sub>2</sub>: C 65.33, H 6.91, N 3.05; found: C 65.54, H 6.78, N 2.95; mp/°C: complex decomposed before melting.

Synthesis of 2. A mixture of **L'** (20 mg, 0.080 mmol) and NaOH (8 mg, 0.32 mmol) in a methanol (50 mL) solution was stirred for 20 min at room temperature under nitrogen atmosphere. Subsequently, [(N<sup>^</sup>C<sup>^</sup>N-CF<sub>3</sub>)PtCl] (89 mg, 0.17 mmol) was added to the above reaction mixture. The mixture was stirred for 24 hours at room temperature. Slow precipitation with methanol (100 mL) in batches for 10 min afforded the pure product as an orange solid. Yield: 78 mg, 0.063 mmol, 79 %; <sup>1</sup>H NMR (400 MHz, 298 K, CDCl<sub>3</sub>, relative to Me<sub>4</sub>Si,  $\delta$  / ppm): 7.06 (s, 4H, phenyl), 7.15 (t,  $J$  = 7.6 Hz, 2H, phenyl), 7.24–7.32 (m, 10H, pyridyl and phenyl), 7.40 (d,  $J$  = 7.6 Hz, 2H, phenyl), 7.55 (d,  $J$  = 7.7 Hz, 2H, phenyl), 7.78 (t,  $J$  = 7.5 Hz, 4H, pyridyl), 9.46 (d,  $J$  = 4.9 Hz, 4H, pyridyl); MS (MALDI):  $m/z$ : 1237.945 [ $M+H$ ]<sup>+</sup>; elemental analysis calcd (%) for C<sub>54</sub>H<sub>28</sub>F<sub>6</sub>N<sub>4</sub>Pt<sub>2</sub>•0.5CH<sub>2</sub>Cl<sub>2</sub>: C 51.17, H 2.29, N 4.38; found: C 51.07, H 2.50, N 4.32; mp/°C: complex decomposed before melting.

**Synthesis of 3.** The procedures were similar to that of **1**, except **P-3** (50 mg, 0.078 mmol) was used in place of [(N<sup>C</sup>N)PtCl] to give the product as a deep-red solid. Yield: 52 mg, 0.024 mmol, 64 %; <sup>1</sup>H NMR (400 MHz, 298 K, CDCl<sub>3</sub>, relative to Me<sub>4</sub>Si, δ / ppm): 0.86–0.89 (m, 12H, –CH<sub>3</sub>), 1.27–1.49 (m, 108H, –CH<sub>2</sub>– and –CH<sub>3</sub>), 1.74–1.81 (m, 4H, –CH<sub>2</sub>–), 1.88–1.95 (m, 4H, –CH<sub>2</sub>–), 3.94 (t, *J* = 6.5 Hz, 4H, –OCH<sub>2</sub>–), 4.05 (t, *J* = 6.5 Hz, 4H, –OCH<sub>2</sub>–), 6.29 (d, *J* = 1.8 Hz, 2H, phenyl), 6.50 (d, *J* = 1.8 Hz, 2H, phenyl), 6.94 (s, 4H, phenyl), 7.26 (s, 4H, pyridyl, mixed with solvent peak), 7.34 (d, *J* = 5.9 Hz, 4H, pyridyl), 9.30 (d, *J* = 5.9 Hz, 4H, pyridyl); MS (MALDI): *m/z*: 2199.628 [M+H]<sup>+</sup>; elemental analysis calcd (%) for C<sub>118</sub>H<sub>156</sub>F<sub>6</sub>N<sub>4</sub>O<sub>4</sub>Pt<sub>2</sub>: C 64.48, H 7.10, N 2.55; found: C 64.20, H 6.98, N 2.77; mp/°C: 197–199.

**Synthesis of 4.** The procedures were similar to that of **1**, except **C-3** (33 mg, 0.060 mmol) was used in place of **L1** to give the product as a yellow solid. Yield: 25 mg, 0.025 mmol, 47 %; <sup>1</sup>H NMR (400 MHz, 298 K, CDCl<sub>3</sub>, relative to Me<sub>4</sub>Si, δ / ppm): 0.85–0.90 (m, 6H, –CH<sub>3</sub>), 1.20–1.48 (m, 36H, –CH<sub>2</sub>–), 1.72–1.80 (m, 2H, –CH<sub>2</sub>–), 1.89–1.96 (m, 2H, –CH<sub>2</sub>–), 3.93 (t, *J* = 6.5 Hz, 2H, –OCH<sub>2</sub>–), 3.03 (t, *J* = 6.8 Hz, 2H, –OCH<sub>2</sub>–), 6.40 (d, *J* = 1.8 Hz, 1H, phenyl), 6.76 (d, *J* = 1.8 Hz, 1H, phenyl), 7.17–7.26 (m, 3H, pyridyl and phenyl, mixed with solvent peak), 7.52 (d, *J* = 7.7 Hz, 2H, phenyl), 7.67 (d, *J* = 8.0 Hz, 2H, pyridyl), 7.92 (t, *J* = 7.6 Hz, 2H, pyridyl), 9.79 (d, *J* = 5.4 Hz, 2H, pyridyl); MS (MALDI): *m/z*: 975.541 [M+H]<sup>+</sup>; elemental analysis calcd (%) for C<sub>48</sub>H<sub>63</sub>N<sub>2</sub>O<sub>2</sub>BrPt: C 59.20, H 6.47, N 2.88; found: C 59.49, H 6.20, N 2.75; mp/°C: 121–123.

**Synthesis of 5.** The procedures were similar to that of **1**, except **L2** (50 mg, 0.052 mmol) was used in place of **L1** to give the product as a yellow solid. Yield: 45 mg, 0.032 mmol, 66 %; <sup>1</sup>H NMR (400 MHz, 298 K, CDCl<sub>3</sub>, relative to Me<sub>4</sub>Si, δ / ppm): 0.85–0.89 (m, 6H, –CH<sub>3</sub>), 1.26–1.50 (m, 36H, –CH<sub>2</sub>–), 1.69–1.88 (m, 4H, –CH<sub>2</sub>–), 3.83 (t, *J* = 6.5 Hz, 2H, –OCH<sub>2</sub>–), 3.97–4.03 (m, 2H, –OCH<sub>2</sub>–), 6.30 (d, *J* = 2.0 Hz, 1H, phenyl), 6.41 (s, 1H, phenyl), 6.45 (d, *J* = 1.4 Hz, 2H, phenyl), 6.73 (d, *J* = 2.0 Hz,

1H, phenyl), 7.20 (t,  $J = 7.8$  Hz, 1H, phenyl), 7.30 (t,  $J = 6.0$  Hz, 2H, pyridyl, mixed with solvent peak), 7.50 (d,  $J = 7.8$  Hz, 2H, phenyl), 7.64 (d,  $J = 8.2$  Hz, 2H, pyridyl), 7.85 (t,  $J = 8.2$  Hz, 2H, pyridyl), 9.73 (d,  $J = 6.0$  Hz, 2H, pyridyl); MS (MALDI):  $m/z$ : 1389.135 [ $M+H$ ]<sup>+</sup>; elemental analysis calcd (%) for C<sub>82</sub>H<sub>116</sub>N<sub>2</sub>O<sub>4</sub>Pt: C 70.94, H 8.36, N 2.02; found: C 70.78, H 8.49, N 2.25; mp/°C: 64–66.

### Synthesis of chloroplatinum(II) precursor complexes

**Synthesis of P-3.** The compound was synthesized according to the modification of a reported procedure (5). **C-10** (130 mg, 0.31 mmol) and K<sub>2</sub>PtCl<sub>4</sub> (125 mg, 0.30 mmol) were added into glacial acetic acid (15 mL), and the mixture was heated for 110 °C for 3 days. After cooling to room temperature, slow participation with ethanol (30 mL) in batches afforded the pure product as an orange solid. Yield: 110 mg, 0.17 mmol, 57 %; <sup>1</sup>H NMR (400 MHz, 298 K, CDCl<sub>3</sub>, relative to Me<sub>4</sub>Si,  $\delta$  / ppm): 1.43 (s, 18H, –CH<sub>3</sub>), 7.35 (d,  $J = 6.1$  Hz, 2H, pyridyl), 7.69–7.73 (m, 4H, pyridyl and phenyl), 9.24 (d,  $J = 6.1$  Hz, 2H, pyridyl); MS (MALDI):  $m/z$ : 606.278 [ $M-Cl$ ]<sup>+</sup>; elemental analysis calcd (%) for C<sub>25</sub>H<sub>26</sub>N<sub>2</sub>F<sub>3</sub>ClPt: C 46.80, H 4.06, N 4.37; found: C 46.65, H 4.26, N 4.50; mp/°C: > 300.

### Synthesis of ligand precursors

**Synthesis of C-2.** The compound was synthesized according to the modification of a reported procedure (6). To a solution of **C-1** (4.4 g, 8.4 mmol) in dry DMF (50 mL) was added *N*-iodosuccinimide (2.0 g, 8.8 mmol). The mixture was heated at 70 °C for overnight under nitrogen atmosphere. Upon completion of the reaction, dichloromethane (200 mL) was added into the reaction mixture, which was washed with deionized water for 2 times. The organic layer was dried over anhydrous MgSO<sub>4</sub>. Removal of the solvent under reduced pressure afforded the crude product, which was purified by column chromatography on silica gel using dichloromethane–petroleum ether (1:20 v / v) as the eluent to give **C-2** as a white solid. Yield: 3.9 g, 6.0 mmol, 71 %; <sup>1</sup>H NMR (400 MHz, 298 K, CDCl<sub>3</sub>, relative to Me<sub>4</sub>Si,  $\delta$  / ppm): 0.82 (t,  $J = 6.7$  Hz, 6H, –CH<sub>3</sub>), 1.21–1.52 (m, 36H, –CH<sub>2</sub>–), 1.65–1.80 (m, 4H, –CH<sub>2</sub>–), 3.81–3.86 (m,

4H,  $-\text{OCH}_2-$ ), 6.24 (d,  $J = 2.4$  Hz, 1H, phenyl), 6.77 (d,  $J = 2.4$  Hz, 1H, phenyl); MS (MALDI):  $m/z$ : 652.35 [ $M$ ]<sup>+</sup>.

**Synthesis of C-3.** The compound was synthesized by a Sonogashira coupling reaction according to the modification of reported procedure (7). **C-2** (1.2 g, 1.8 mmol), Pd(PPh<sub>3</sub>)<sub>2</sub>Cl<sub>2</sub> (66 mg, 0.09 mmol), CuI (18 mg, 0.09 mmol) and trimethylsilylacetylene (TMSA, 1.0 mL, 7.2 mmol) were added to the flask with degassed triethylamine (60 mL), and the mixture was stirred overnight at room temperature under nitrogen atmosphere. Removal of the solvent under reduced pressure afforded the crude product, which was purified by column chromatography on silica gel using dichloromethane–petroleum ether (1:20 v / v) as the eluent to give **C-3-TMS** (0.9 g, 1.45 mmol) as a light-yellow solid. Subsequently, to the THF–methanol (1:1 v / v, 50 mL) solution mixture of **C-3-TMS** (0.5 g, 0.8 mmol) was added K<sub>2</sub>CO<sub>3</sub> (167 mg, 1.2 mmol). The reaction mixture was stirred for 2 hours at room temperature. Then the reaction mixture was poured into dichloromethane (100 mL) and was washed with deionized water for 2 times. The organic layer was dried over anhydrous MgSO<sub>4</sub>. Removal of the solvent under reduced pressure afforded the crude product, which was used for subsequent reactions without further purification. Yield: 390 mg, 0.71 mmol, 69 %; <sup>1</sup>H NMR (400 MHz, CDCl<sub>3</sub>, 298 K, relative to Me<sub>4</sub>Si,  $\delta$  / ppm): 0.88 (t,  $J = 6.6$  Hz, 6H,  $-\text{CH}_3$ ), 1.26–1.52 (m, 36H,  $-\text{CH}_2-$ ), 1.72–1.85 (m, 4H,  $-\text{CH}_2-$ ), 3.90–3.99 (m, 4H,  $-\text{OCH}_2-$ ), 6.32 (d,  $J = 1.5$  Hz, 1H, phenyl), 6.69 (d,  $J = 1.5$  Hz, 1H, phenyl); MS (MALDI):  $m/z$ : 551.170 [ $M+\text{H}$ ]<sup>+</sup>.

**Synthesis of C-4:** The compound was synthesized according to the modification of a reported procedure (8). CuI (82 mg, 0.44 mmol) was dispersed in a solution of dichloromethane (50 mL), *N,N,N',N'*-tetramethylethylenediamine (0.16 mL, 1.1 mmol) was added and the mixture was stirred for 5 min. The dichloromethane solution of **C-3** (1.2 g, 2.2 mmol) was then added to the mixture and stirred for overnight at room temperature at the oxygen atmosphere. Upon completion of the reaction, the reaction mixture was washed with deionized water for 2 times and the

organic layer was dried over anhydrous MgSO<sub>4</sub>. Removal of the solvent under reduced pressure afforded the crude product, which was purified by column chromatography on silica gel using dichloromethane–petroleum ether (1:5 v / v) as the eluent to give **C-4** as a pale-yellow solid. Yield: 900 mg, 0.82 mmol, 75 %; <sup>1</sup>H NMR (400 MHz, 298 K, CDCl<sub>3</sub>, relative to Me<sub>4</sub>Si,  $\delta$  / ppm): 0.85–0.89 (m, 12H, –CH<sub>3</sub>), 1.23–1.50 (m, 72H, –CH<sub>2</sub>–), 1.72–1.86 (m, 8H, –CH<sub>2</sub>–), 3.91–3.99 (m, 8H, –OCH<sub>2</sub>–), 6.34 (d,  $J$  = 2.0 Hz, 2H, phenyl), 6.70 (d,  $J$  = 2.0 Hz, 2H, phenyl); MS (MALDI):  $m/z$ : 1095.655 [ $M+H$ ]<sup>+</sup>.

Synthesis of C-5 and C-7. The compounds were synthesized according to the modification of a reported procedure (9). To a solution of **C-3** (1.32 g, 2.0 mmol) and AgNO<sub>3</sub> (0.41 g, 2.4 mmol) in acetone (30 mL) was added. NBS (0.53 g, 3.0 mmol), and the mixture was stirred in the dark at room temperature for overnight. Removal of the solvent under reduced pressure afforded the crude product **C-5** (1.0g, 1.6 mmol) which was used without further purification. CuI (0.3 g, 1.6 mmol) was dispersed in a mixture of butylamine (6 mL) and water (8 mL), and the mixture was stirred for 5 min. Subsequently, NH<sub>2</sub>OH•HCl was added in portions until the solution turned colorless. **C-6** (0.6 g, 1.3 mmol) was added and the mixture was stirred for 5 min. The dichloromethane solution of **C-5** (0.8 g, 1.3 mmol) was then added dropwise to the mixture and stirred for another 30 min at room temperature. Upon completion of the reaction, the reaction mixture was washed with deionized water for 2 times and the organic layer was dried over anhydrous MgSO<sub>4</sub>. Removal of the solvent under reduced pressure afforded the crude product, which was purified by column chromatography on silica gel using dichloromethane–petroleum ether (1:5 v / v) as the eluent to give **C-7** as a yellow solid. Yield: 630 mg, 0.62 mmol, 38 %; <sup>1</sup>H NMR (400 MHz, 298 K, CDCl<sub>3</sub>, relative to Me<sub>4</sub>Si,  $\delta$  / ppm): 0.85–0.90 (m, 12H, –CH<sub>3</sub>), 1.24–1.50 (m, 72H, –CH<sub>2</sub>–), 1.72–1.87 (m, 8H, –CH<sub>2</sub>–), 3.89–4.00 (m, 8H, –OCH<sub>2</sub>–), 6.35 (d,  $J$  = 1.8 Hz, 1H, phenyl), 6.46 (s, 1H, phenyl), 6.65 (d,  $J$  = 2.0 Hz, 2H, phenyl), 6.71 (d,  $J$  = 1.8 Hz, 1H, phenyl); MS (MALDI):  $m/z$ : 1019.942 [ $M+H$ ]<sup>+</sup>.



**Synthesis of C-8.** The compounds were synthesized according to the modification of a reported procedure (10). 3,5-Dibromobenzotrifluoride (1.0 g, 3.3 mmol), bispinacolatodiboron (1.8 g, 7.2 mmol), Pd(dppf)Cl<sub>2</sub> (178 mg, 0.23 mmol) and KOAc (2.6 g, 26.2 mmol) were added to the flask with degassed dioxane (70 mL), and the mixture was stirred at 110 °C for 24 hours under nitrogen atmosphere. Upon cooling to the room temperature, ethyl acetate (150 mL) was added. The reaction mixture was washed with deionized water for 2 times and the organic layer was dried over anhydrous MgSO<sub>4</sub>. Removal of the solvent under reduced pressure afforded the crude product, which was purified by column chromatography on silica gel using ethyl acetate–petroleum ether (1:15 v / v) as the eluent to give **C-8** as a white solid. Yield: 1.0 g, 2.5 mmol, 78 %; <sup>1</sup>H NMR (400 MHz, 298 K, CDCl<sub>3</sub>, relative to Me<sub>4</sub>Si,  $\delta$  / ppm): 1.35 (s, 24H, –CH<sub>3</sub>), 8.13 (s 2H, phenyl), 8.41 (s 1H, phenyl); MS (MALDI): *m/z*: 399.55 [*M*+H]<sup>+</sup>.

**Synthesis of C-9.** The compounds were synthesized according to the modification of a reported procedure (10). 2-Bromopyridine (1.1 g, 6.7 mmol), **C-8** (1.0 g, 3.0 mmol), Pd(PPh<sub>3</sub>)<sub>4</sub> (345 mg, 0.30 mmol) and Na<sub>2</sub>CO<sub>3</sub> (2.1 g, 15.0 mmol) were added to the flask with degassed DME/H<sub>2</sub>O mixture (60 mL, 1:1, v/v), and the mixture was stirred at 100 °C for 24 hours under nitrogen atmosphere. Upon cooling to the room temperature, ethyl acetate (100 mL) was added. The reaction mixture was washed with deionized water for 2 times and the organic layer was dried over anhydrous MgSO<sub>4</sub>. Removal of the solvent under reduced pressure afforded the crude product, which was purified by column chromatography on silica gel using ethyl acetate–petroleum ether (1:8 v / v) as the eluent to give **C-9** as a white solid. Yield: 0.7 g, 2.3 mmol, 77 %; <sup>1</sup>H NMR (400 MHz, 298 K, CDCl<sub>3</sub>, relative to Me<sub>4</sub>Si,  $\delta$  / ppm): 7.32 (t, *J* = 6.2 Hz, 2H, pyridyl), 7.83 (t, *J* = 7.0 Hz, 2H, pyridyl), 7.89 (d, *J* = 7.9 Hz, 2H, pyridyl), 8.34 (s, 2H, phenyl), 8.75 (d, *J* = 4.6 Hz, 2H, pyridyl), 8.83 (s, 1H, phenyl); MS (MALDI): *m/z*: 301.23 [*M*+H]<sup>+</sup>;

### Synthesis of C-10.

The procedures were similar to that of compound **C-9**, except 2-bromo-4-(tert-butyl)pyridine (296 mg, 1.38 mmol) was used in place of 2-Bromopyridine. The crude product was purified by column chromatography on silica gel using ethyl acetate–petroleum ether (1:10 v / v) as the eluent to give the desired product as a gray-white solid. Yield: 130 mg, 0.31 mmol, 50 %; <sup>1</sup>H NMR (400 MHz, 298 K, CDCl<sub>3</sub>, relative to Me<sub>4</sub>Si,  $\delta$  / ppm): 1.40 (s, 18H, –CH<sub>3</sub>), 7.31 (d,  $J$  = 5.2 Hz, 2H, pyridyl), 7.80 (s, 2H, pyridyl), 8.28 (s, 2H, phenyl), 8.65 (d,  $J$  = 5.2 Hz, 2H, pyridyl), 8.74 (s, 1H, phenyl); MS (MALDI):  $m/z$ : 413.34 [ $M+H$ ]<sup>+</sup>.

### **Synthesis of alkynyl ligands**

Synthesis of L1. The procedures were similar to that of compound **C-3**, except **C-4** (200 mg, 0.2 mmol) was used in place of **C-2** with heating at 70 °C. The crude product was purified by column chromatography on silica gel using dichloromethane–petroleum ether (1:3 v / v) as the eluent to give the desired product as an off-white solid. Yield: 110 mg, 0.11 mmol, 52 %; <sup>1</sup>H NMR (400 MHz, 298 K, CDCl<sub>3</sub>, relative to Me<sub>4</sub>Si,  $\delta$  / ppm): 0.86–0.89 (m, 12H, –CH<sub>3</sub>), 1.20–1.47 (m, 72H, –CH<sub>2</sub>–), 1.73–1.87 (m, 8H, –CH<sub>2</sub>–), 3.22 (s, 2H, –C≡C–H), 3.93 (t,  $J$  = 6.5 Hz, 4H, –OCH<sub>2</sub>–), 4.00 (t,  $J$  = 6.7 Hz, 4H, –OCH<sub>2</sub>–), 6.44 (d,  $J$  = 1.8 Hz, 2H, phenyl), 6.62 (d,  $J$  = 1.8 Hz, 2H, phenyl); MS (MALDI):  $m/z$ : 986.669 [ $M$ ]<sup>+</sup>; mp/°C: 53–55.

Synthesis of L2. The procedures were similar to that of compound **L1**, except **C-7** (400 mg, 0.39 mmol) was used in place of **C-4**. The crude product was purified by column chromatography on silica gel using dichloromethane–petroleum ether (1:3 v / v) as the eluent to give the desired product as a yellow solid. Yield: 275 mg, 0.29 mmol, 74 %; <sup>1</sup>H NMR (400 MHz, 298 K, CDCl<sub>3</sub>, relative to Me<sub>4</sub>Si,  $\delta$  / ppm): 0.83–0.90 (m, 12H, –CH<sub>3</sub>), 1.24–1.51 (m, 72H, –CH<sub>2</sub>–), 1.72–1.87 (m, 8H, –CH<sub>2</sub>–), 3.34 (s, 1H, –C≡C–H), 3.89–4.01 (m, 8H, –OCH<sub>2</sub>–), 6.42 (d,  $J$  = 1.3 Hz, 1H, phenyl), 6.46 (s, 1H, phenyl), 6.60 (d,  $J$  = 1.3 Hz, 1H, phenyl), 6.65 (d,  $J$  = 1.8 Hz, 2H, phenyl); MS (MALDI):  $m/z$ : 962.981 [ $M$ ]<sup>+</sup>; mp/°C: 45–47.

## **Physical Measurements and Instrumentations**

All  $^1\text{H}$  NMR spectra were recorded on a Bruker DPX 400 FT–NMR spectrometer 400 MHz. Matrix assisted laser desorption ionization time of flight mass were performed on a Bruker ultrafleXtreme MALDI–TOF/TOF mass spectrometer using positive-ion mode (Bruker Daltonics). Elemental analyses of the complexes were performed on a Vario EL elemental analyzer. Melting points (mp) were measured on a Buchi M-560 apparatus with heating rate of  $1^\circ\text{C}/\text{min}$ .

Electronic absorption spectra and temperature-dependent electronic absorption spectra were recorded using a Shimadzu UV–3600 spectrophotometer and a Varian Cary 50 UV-vis spectrophotometer, respectively, with the monitoring of temperature using the Varian Cary single-cell Peltier thermostat. The photoluminescence spectra were measured on Edinburgh Instruments FS5 and Edinburgh Instruments FLS980 fluorescence spectrophotometers. Emission lifetime measurements were performed using LP980 transient absorption spectrometer (Edinburgh Instruments Ltd, UK). The excitation source was the 355 nm output (third harmonic) of an Nd: YAG laser (Quanta-Ray Lab130 Pulsed Nd:YAG Laser) and the probe light source was a Xe900 450 W xenon arc lamp. All solutions for photophysical studies were prepared under high vacuum in a  $10\text{-cm}^3$  round-bottomed flask equipped with a sidearm 1-cm fluorescence cuvette and sealed from the atmosphere by a Rotaflo HP6/6 quick-release Teflon stopper. Solutions were rigorously degassed on a high-vacuum line in a two-compartment cell with no less than four successive freeze-pump-thaw cycles. The emission quantum yields were measured on a Hamamatsu C9920-02G absolute PL quantum yield measurement system. Time-resolved emission spectra were obtained using an Edinburgh Instrument LP980KS transient absorption spectrometer equipped with a R928P photomultiplier tube, with capability for time-resolved emission measurements. Dynamic light scattering spectra were obtained using a Malvern Panalytical Zetasizer Nano ZS90 particle size analyzer. Scanning electron microscope experiments were performed by using ZEISS GeminiSEM 500. The atomic force microscopy measurements were performed on Bruker Dimension Scanfast in a tapping mode. The SEM and AFM samples were

prepared by dropcasting solutions onto silicon wafers and allowing them to dry naturally. Transmission electron micrographs (TEM) were recorded on a FEI Tecnai G2 Spirit. The samples for TEM were prepared by dropcasting solutions on the carbon-coated copper grids.

### **Time-Dependent Emission and UV-Vis Spectral Changes**

1. Solutions of **1** in dichloromethane (0.3 mL,  $5.4 \times 10^{-4}$  M) were injected into hexane, cyclohexane, decane, or methylcyclohexane (2.7 mL) to yield the respective solution mixtures of **1** in hexane-dichloromethane, cyclohexane-dichloromethane, decane-dichloromethane, methylcyclohexane-dichloromethane (9:1, v/v) ( $5.4 \times 10^{-5}$  M). After rapid mixing, the emission intensity at 516 nm was recorded with time.
2. Solutions of **1** in dichloromethane (0.3 mL) were injected into hexane or cyclohexane (2.7 mL) to yield solution mixtures of **1** in hexane-dichloromethane, cyclohexane-dichloromethane (9:1, v/v) respectively. After rapid mixing, the absorbance intensity at 425 nm was recorded with time under different conditions.

### **Crystal Structure Determination**

Single crystals of **2** suitable for X-ray diffraction studies were grown by vapor diffusion of diethyl ether into a concentrated dichloromethane solution of **2**. Single-crystal diffraction data of **2** were collected on an Agilent SuperNova X-ray diffractometer using micro-focus dual with X-ray Source of Cu-K $\alpha$  radiation ( $\lambda = 1.54178 \text{ \AA}$ ) at 150 K. Using Olex2 (11), the structure of the crystal was solved with the ShelXS (12) structure solution program using direct methods and refined with the XL (12) refinement package using least squares minimization. CCDC XXX contains the supplementary crystallographic data for **2**. This can be obtained free of charge from the Cambridge Crystallographic Data Centre via [www.ccdc.cam.ac.uk/data\\_request/cif](http://www.ccdc.cam.ac.uk/data_request/cif).

## Computational Details

All the density functional theory (DFT) calculations were performed using the Gaussian 09 suite of programs (13). The ground-state geometries of both the open and closed forms of **1** and **3** were fully optimized by DFT with the hybrid meta exchange-correlation M06 functional (14), which is recommended for application in organometallic and metal coordination compounds and for non-covalent interactions (14, 15), in conjunction with the solvation model density (SMD) continuum method (16) using dichloromethane as the solvent. Vibrational frequencies were then computed for all stationary points to verify that each was a minimum (NIMAG = 0) on the potential energy surface (PES). The lowest-lying triplet excited state ( $T_1$ ) of the open form of **1** has also been optimized with the unrestricted method (UM06) in order to calculate its emission energy. All calculations were performed with the Stuttgart effective core potentials (ECPs) and the associated basis set to describe Pt (17), with two f-type polarization functions ( $\zeta = 0.70$  and  $0.14$ ) (18), and the 6-31G(d,p) basis set (19–22) to describe all other atoms. All the DFT calculations were performed with a pruned (99,590) grid for numerical integration. The Cartesian coordinates of the optimized ground-state geometries of the open and closed forms of **1** and **3**, and those of the optimized  $T_1$  geometry of the open form of **1**, are given in Tables S3–S7.

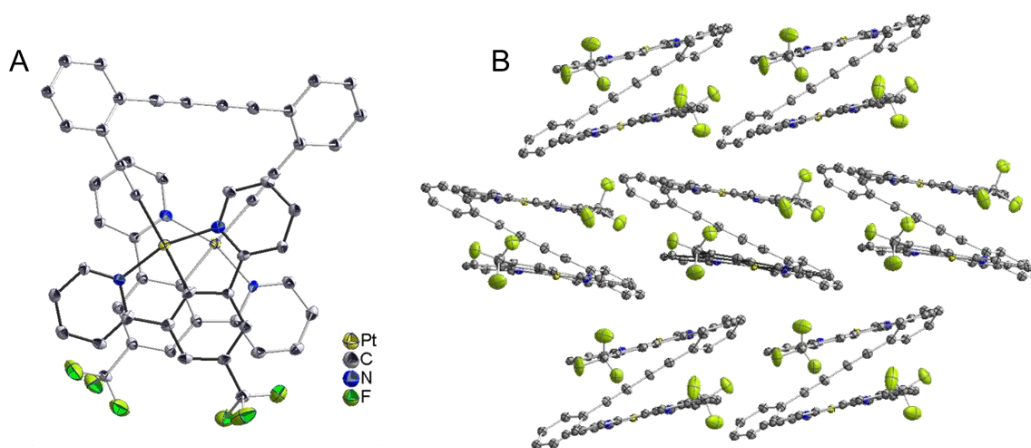

**Figure S1.** (A) Perspective drawing of **2**. Hydrogen atoms and solvent molecules are omitted for clarity. Thermal ellipsoids were shown at the 30 % probability level. (B) Crystal packing of **2** without intermolecular  $\pi$ - $\pi$  interaction.

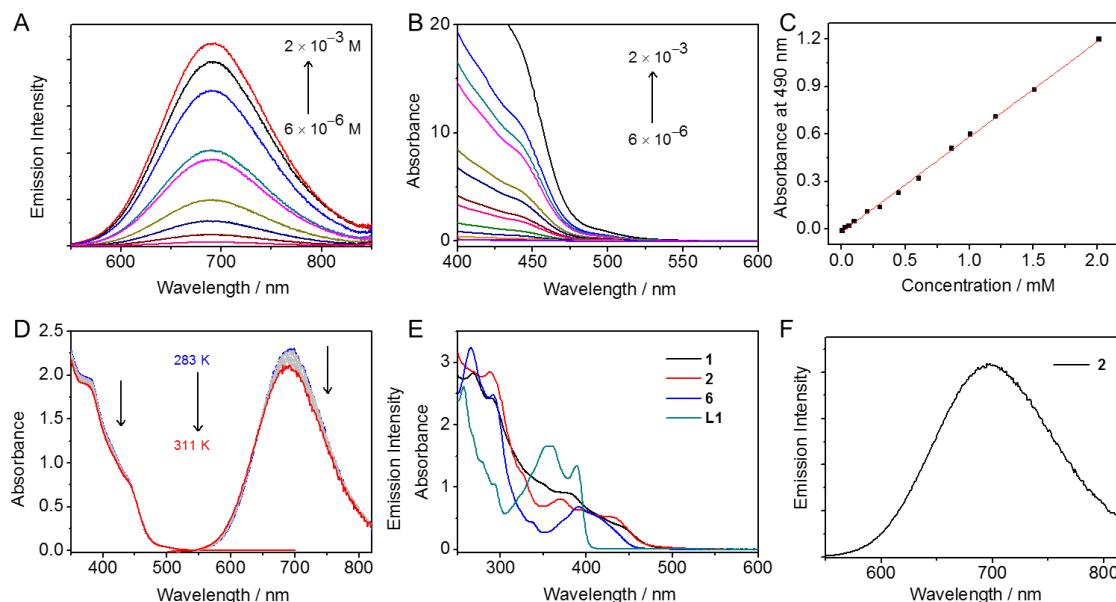

**Figure S2.** Concentration-dependent (A) emission and (B) UV-vis absorption spectra of **1** in dichloromethane from  $6.0 \times 10^{-6}$  to  $2.0 \times 10^{-3}$  M. (C) A plot of apparent absorbance at 490 nm as a function of concentration and the solid line gives the linear relationship between absorbance and concentration. The apparent absorbance is the absorbance corrected to 1-cm pathlength equivalence. (D) Temperature-dependent UV-vis absorption and emission spectra of **1** in dichloromethane at  $8.2 \times 10^{-5}$  M. (E) UV-vis absorption spectra of **1**, **2**, **6** and **L1** in dichloromethane solutions. (F) Emission spectrum of **2** in degassed dichloromethane solution ( $2.5 \times 10^{-5}$  M).

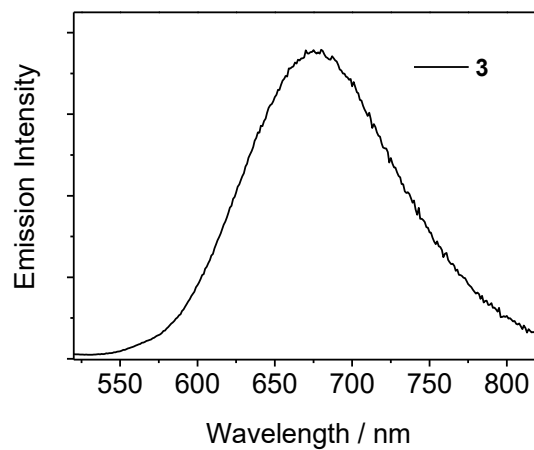

**Figure S3.** Emission spectrum of **3** in degassed dichloromethane solution ( $1.3 \times 10^{-5}$  M).

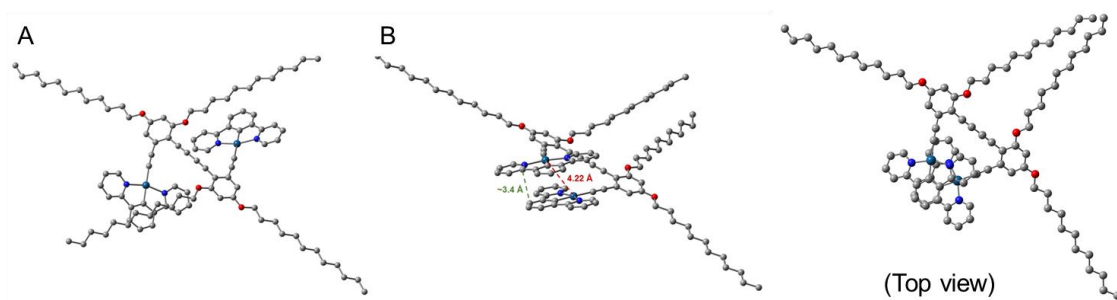

**Figure S4.** Optimized structures of molecular hinge **1** in (A) open form and (B) closed form.

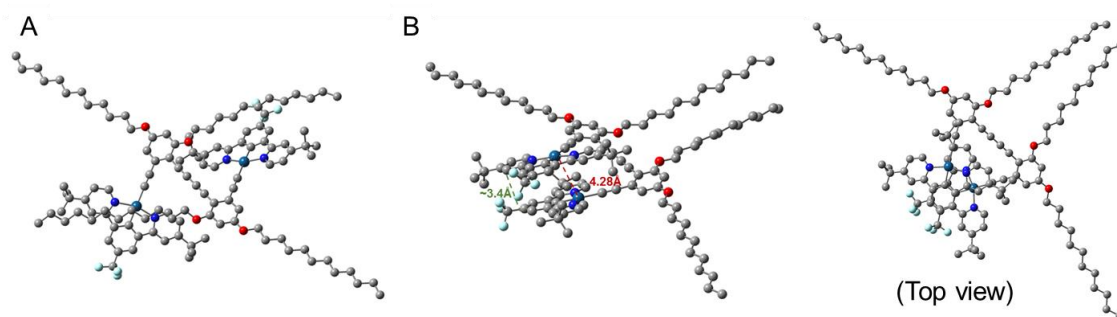

**Figure S5.** Optimized structures of molecular hinge **3** in (A) open form and (B) closed form.

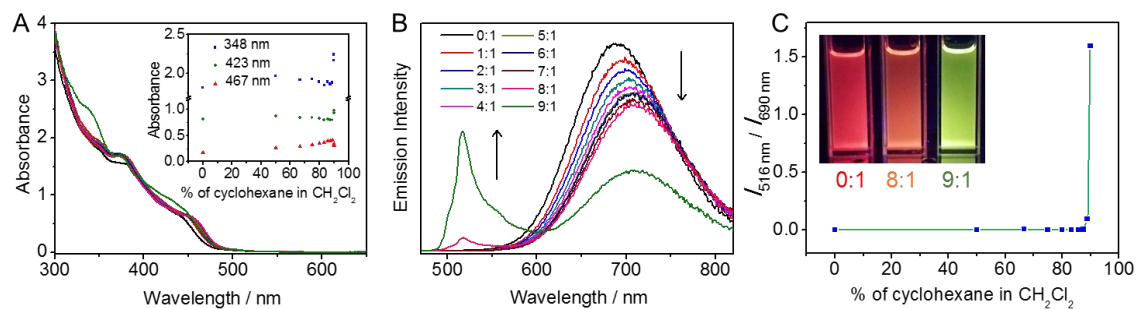

**Figure S6.** Solvent-dependent (A) UV-vis absorption and (B) emission spectra of **1** upon increasing cyclohexane portion in dichloromethane (v/v,  $5.6 \times 10^{-5}$  M). Inset of (A): Plots of the corresponding absorbance at 348, 423 and 467 nm upon increasing cyclohexane content. (C) The phosphorescence intensity ratio between 516 and 690 nm ( $I_{516} / I_{690}$ ) upon increasing cyclohexane portion in dichloromethane (v/v,  $5.6 \times 10^{-5}$  M). Inset: Photographs of different emission colors in cyclohexane-dichloromethane (0:1, 8:1, 9:1, v/v) mixtures.

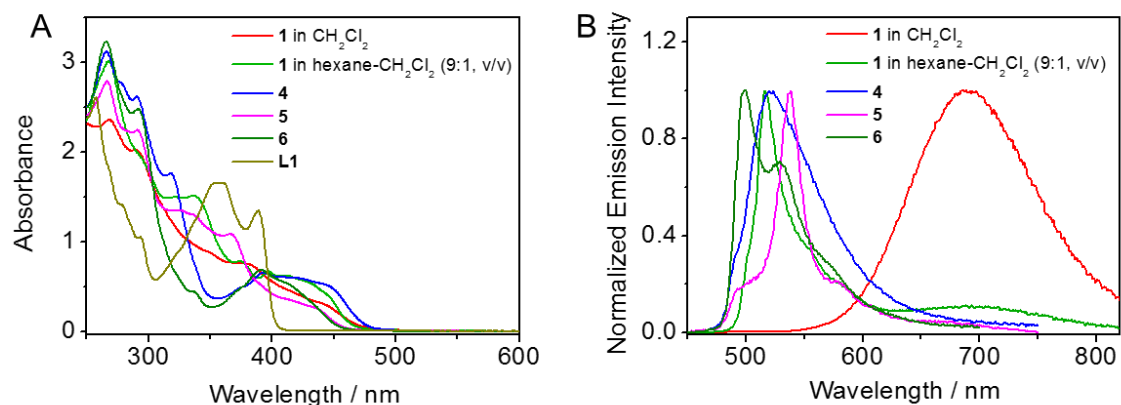

**Figure S7.** (A) UV-vis absorption of **1**, **4–6** and **L1** in dichloromethane solutions and UV-vis absorption of **1** in hexane-dichloromethane (9:1, v/v) mixture. (B) Emission spectra of **1**, **4–6** in dichloromethane solutions and emission spectrum of **1** in hexane-dichloromethane (9:1, v/v) mixture.



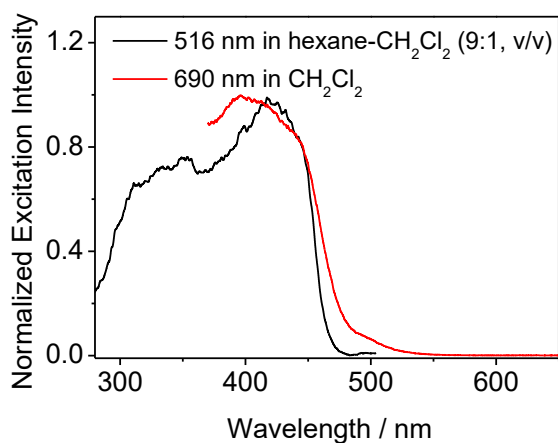

**Figure S8.** Excitation spectra of **1** with emission peaks at 690 nm in dichloromethane and 516 nm in hexane-dichloromethane (9:1, v/v) mixture respectively.

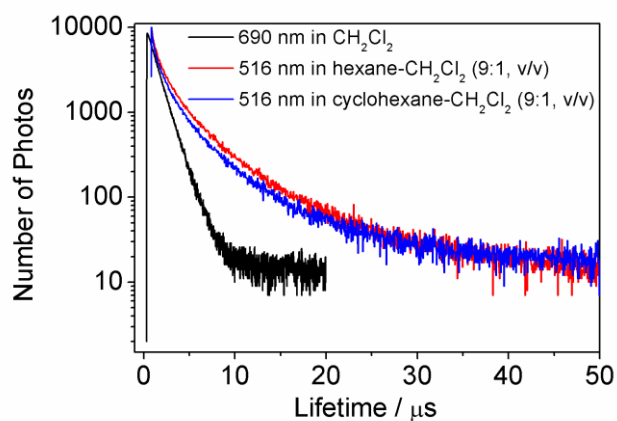

**Figure S9.** Emission decay profiles monitored at 690 nm in dichloromethane solution with closed form ( $\tau = 1.4 \mu\text{s}$ ) and 516 nm in hexane/cyclohexane-dichloromethane (9:1, v/v) mixtures with open form ( $\tau = 3.6 \mu\text{s}$ ) after a laser pulse.

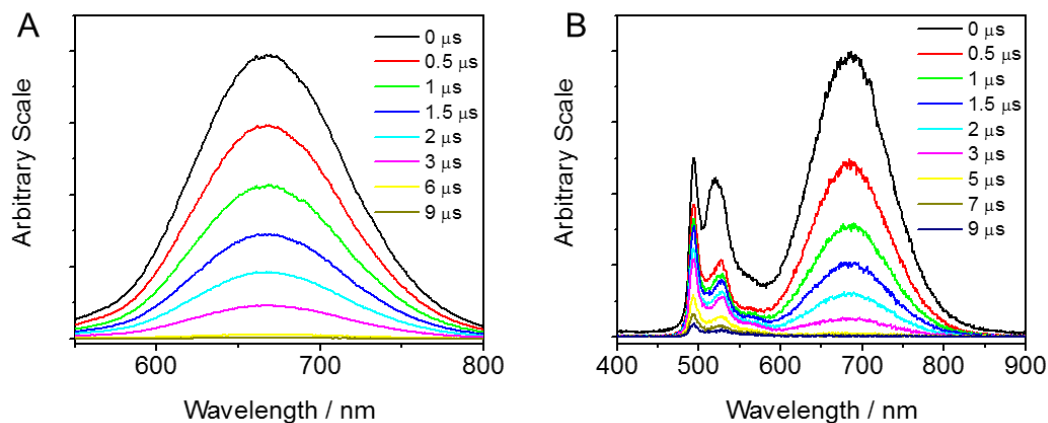

**Figure S10.** Time-resolved emission spectra of **1** in (A) dichloromethane solution ( $5.7 \times 10^{-5}$  M) and (B) hexane-dichloromethane (9:1, v/v) mixture ( $5.7 \times 10^{-5}$  M).

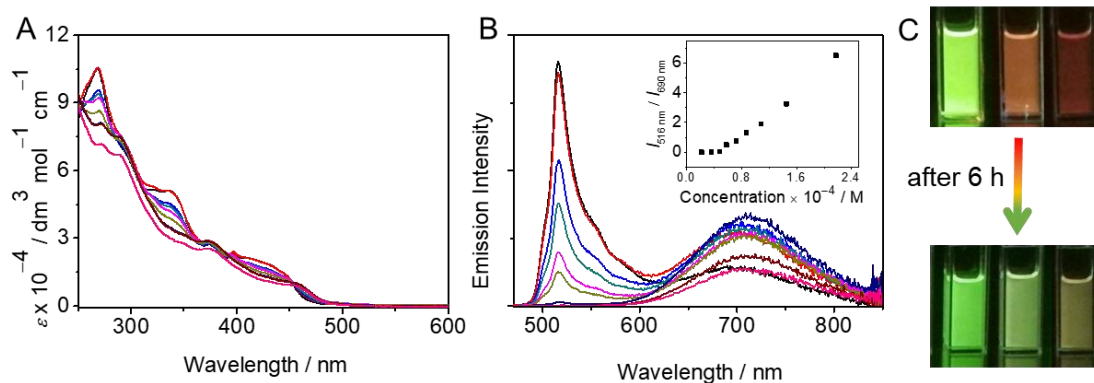

**Figure S11.** Concentration-dependent (A) UV-vis absorption and (B) emission spectra of **1** in cyclohexane-dichloromethane (9:1, v/v) mixtures at different concentrations from  $2.2 \times 10^{-5}$  to  $2.2 \times 10^{-4}$  M at room temperature. Inset: A plot of the corresponding phosphorescence intensity ratio between 516 and 690 nm ( $I_{516} / I_{690}$ ) in cyclohexane-dichloromethane (9:1, v/v) mixtures at different concentrations. (C) Photographs of emission color changes in cyclohexane-dichloromethane (9:1, v/v) mixtures at concentrations of  $7.2 \times 10^{-5}$ ,  $5.8 \times 10^{-5}$ ,  $4.8 \times 10^{-5}$  M (from left to right).

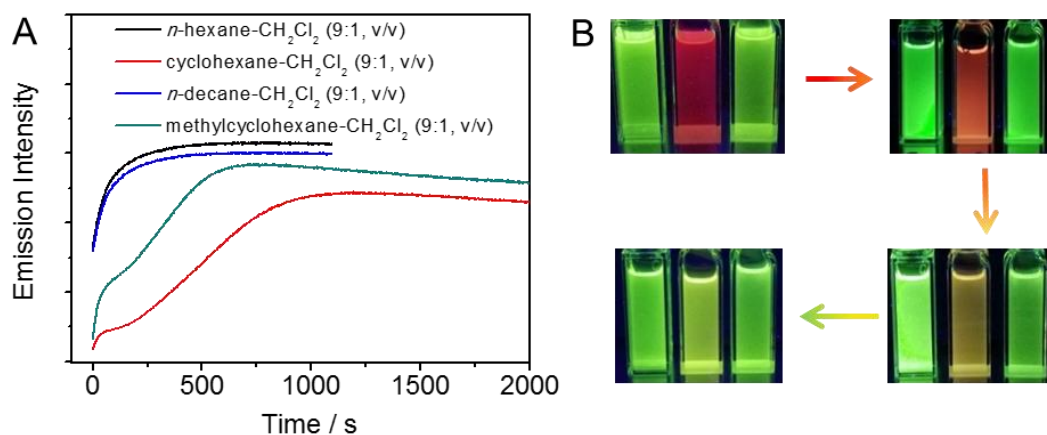

**Figure S12.** (A) Time-dependent emission spectral changes of **1** in *n*-hexane/*n*-decane/cyclohexane/methylcyclohexane-dichloromethane (9:1, v/v) mixtures ( $5.4 \times 10^{-5}$  M). (B) Photographs of hexane-dichloromethane, cyclohexane-dichloromethane and decane-dichloromethane (9:1, v/v, left to right) mixtures with increasing time.

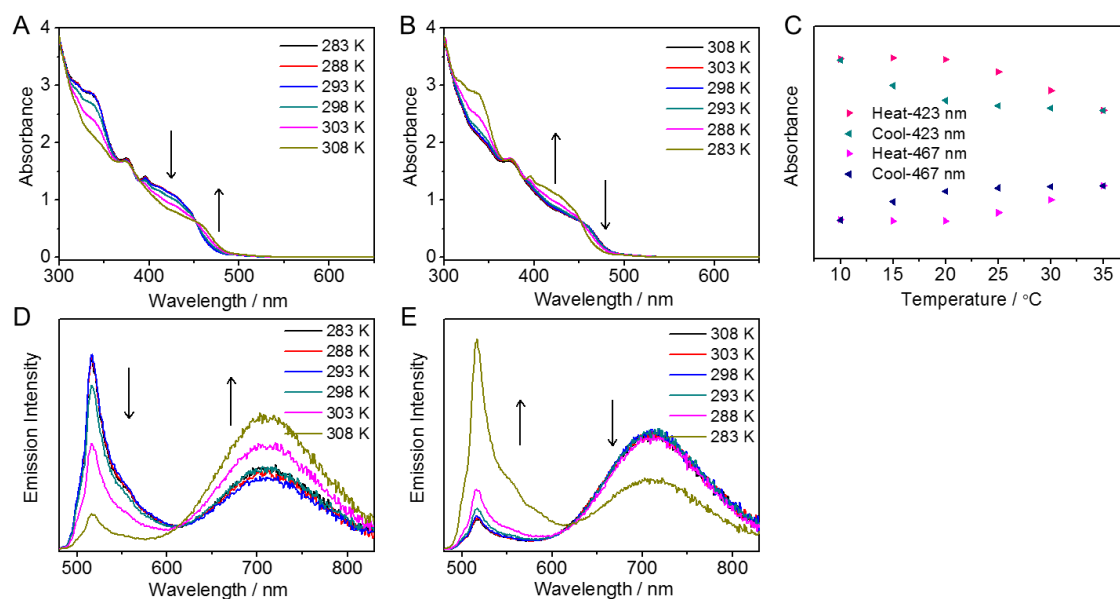

**Figure S13.** Temperature-dependent UV-vis absorption spectra of **1** in cyclohexane-dichloromethane (9:1, v/v) ( $5.6 \times 10^{-5}$  M) mixture with (A) heating and (B) cooling processes. (C) Plots of the corresponding absorbance at 423 and 467 nm at different temperatures with heating and cooling processes. Temperature-dependent emission spectra of **1** in cyclohexane-dichloromethane (9:1, v/v) ( $5.6 \times 10^{-5}$  M) mixture with (D) heating and (E) cooling processes.

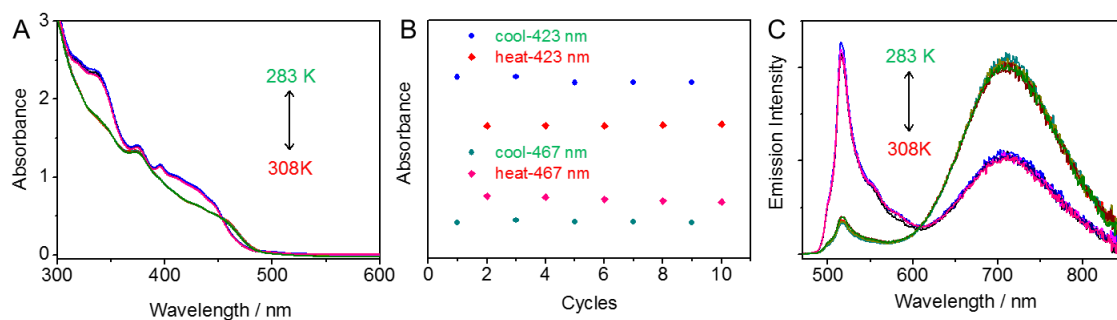

**Figure S14.** (A) Reversible processes of the molecular hinge between open form and closed form with electronic absorption spectra of **1** in cyclohexane-dichloromethane (9:1, v/v) ( $5.6 \times 10^{-5}$  M) mixture in 5 cycles. (B) Plots of the corresponding absorbance at 423 and 467 nm with the number of repeating cycles. (C) Reversible processes of the molecular hinge between open form and closed form with emission spectra of **1** in cyclohexane-dichloromethane (9:1, v/v) ( $5.6 \times 10^{-5}$  M) mixture in 5 cycles.

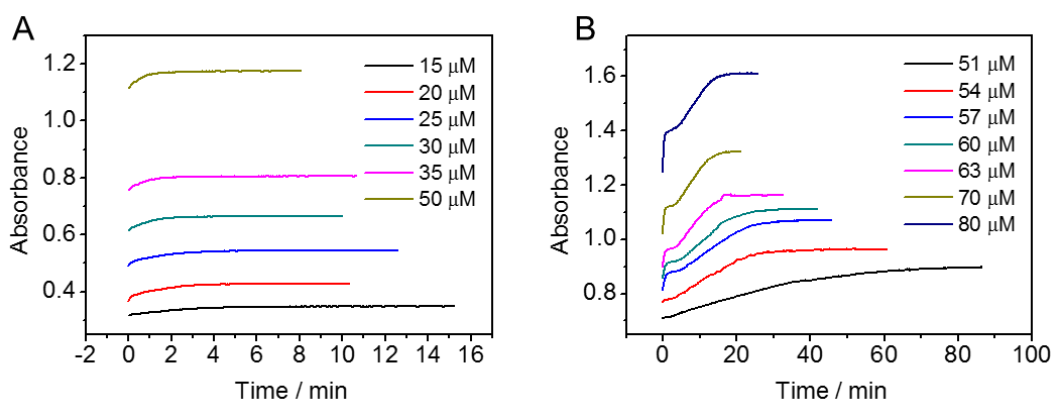

**Figure S15.** (A) Time-dependent UV-vis spectra of complex **1** in hexane-dichloromethane (9:1, v/v) mixtures at different concentrations from 15 to 50  $\mu\text{M}$  at 293 K. (B) Time-dependent UV-vis spectra of complex **1** in cyclohexane-dichloromethane (9:1, v/v) mixtures at different concentrations from 51 to 80  $\mu\text{M}$  at 293 K.

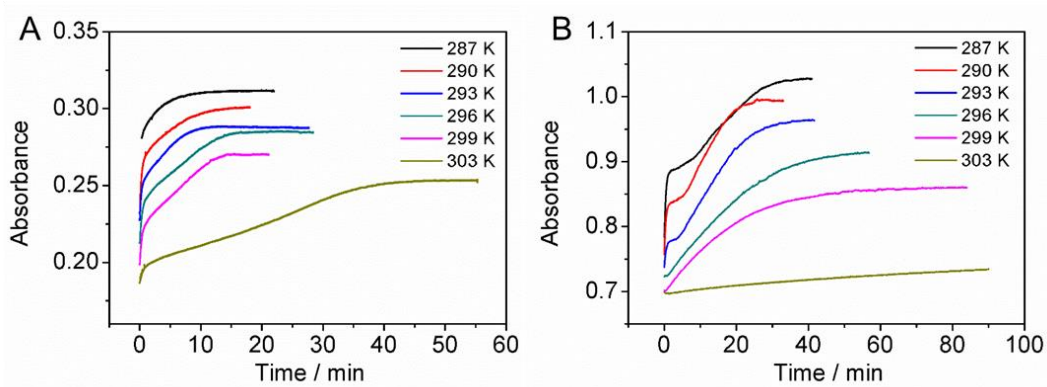

**Figure S16.** Time-dependent UV-vis spectra of complex **1** in (A) hexane-dichloromethane (9:1, v/v) ( $1.5 \times 10^{-5}$  M) and (B) cyclohexane-dichloromethane (9:1, v/v) ( $5.7 \times 10^{-5}$  M) mixtures at different temperatures.

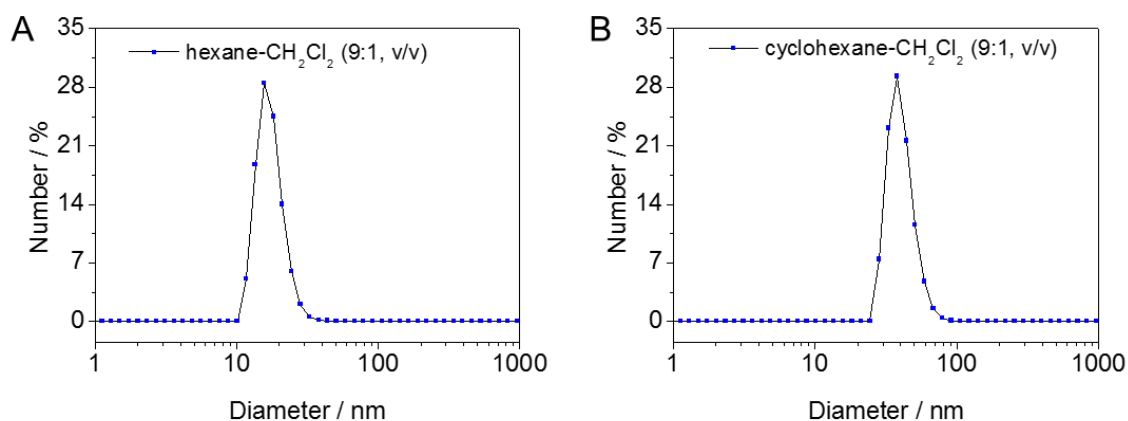

**Figure S17.** DLS studies of **1** in (A) hexane-dichloromethane (9:1, v/v) mixture ( $5.7 \times 10^{-5}$  M) and (B) cyclohexane-dichloromethane (9:1, v/v) mixture ( $5.7 \times 10^{-5}$  M) respectively.

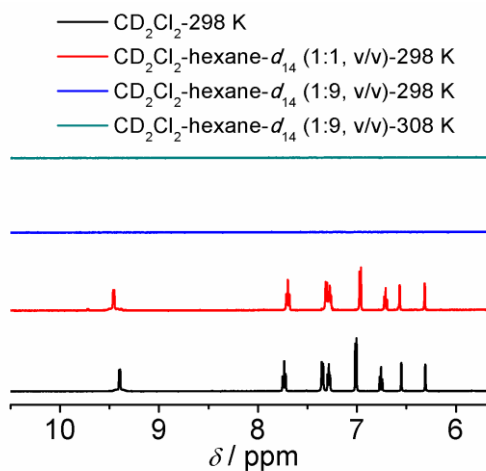

**Figure S18.**  $^1\text{H}$  NMR spectra of **1** upon increasing the hexane- $d_{14}$  portion in  $\text{CD}_2\text{Cl}_2$  ( $4.6 \times 10^{-4}$  M).

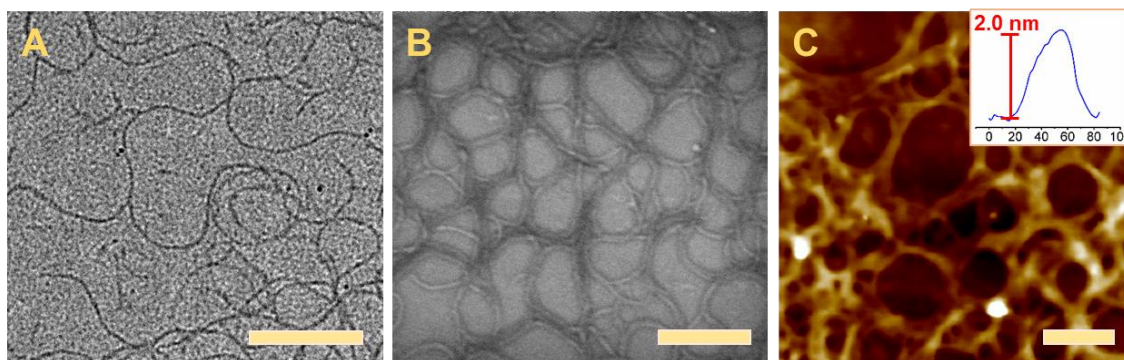

**Figure S19.** (A) TEM, (B) SEM and (C) AFM images of **1** prepared from cyclohexane-dichloromethane (9:1, v/v) mixture ( $5.6 \times 10^{-5}$  M). Scale bars: 200 nm.

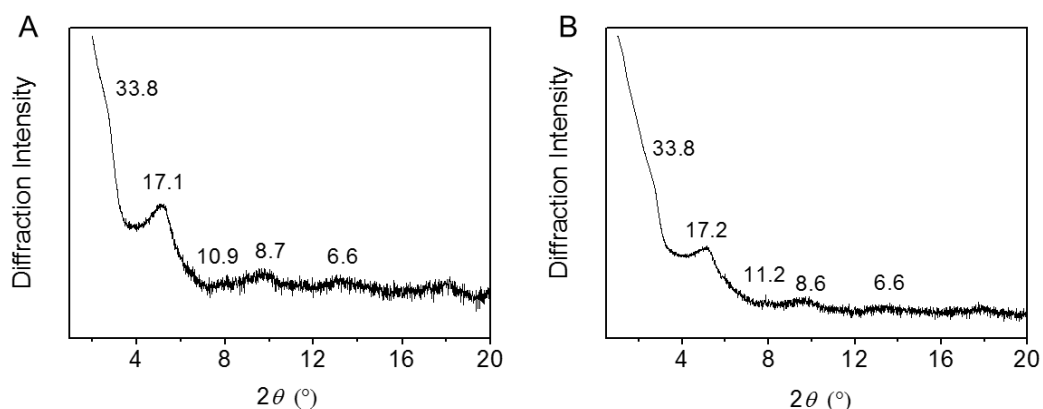

**Figure S20.** XRD patterns of **1** prepared from (A) hexane-dichloromethane (9:1, v/v) mixture and (B) cyclohexane-dichloromethane (9:1, v/v) mixture with the ratio of about 1:1/2:1/3:1/4:1/5.

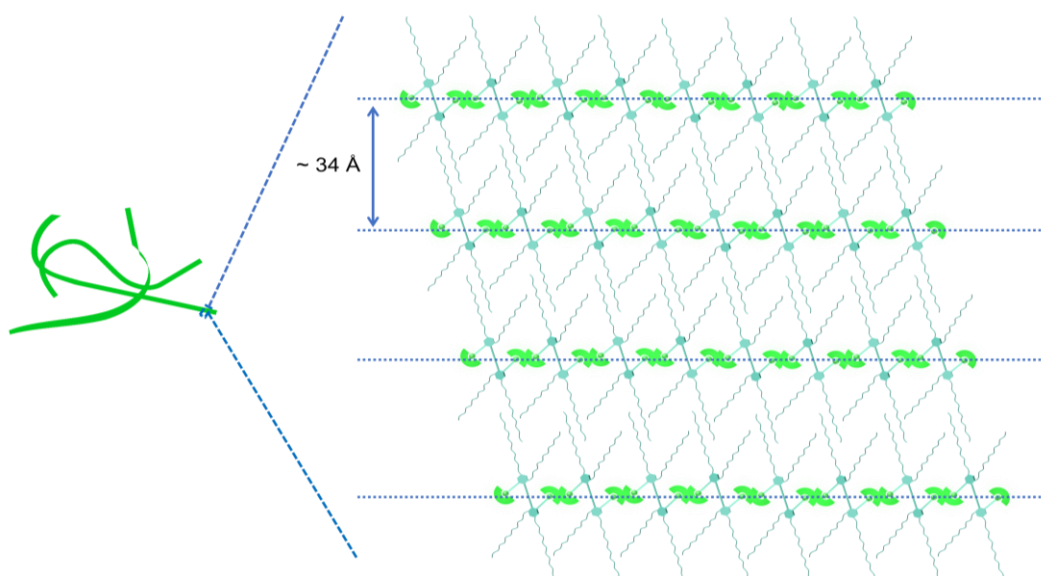

**Figure S21.** Schematic representation of one-dimensional nanofiber formed in hexane/cyclohexane-dichloromethane (9:1, v/v) mixtures.

**Video 1.** A video showing the luminescence changes in hexane-dichloromethane mixture of **1**.

**Video 2.** A video showing the luminescence changes in cyclohexane-dichloromethane mixture of **1**.



**Table S1.** Crystallographic and structural refinement data for complex **2**

| Identification code                            | Complex <b>2</b>                                                              |
|------------------------------------------------|-------------------------------------------------------------------------------|
| Empirical formula                              | C <sub>54</sub> H <sub>28</sub> F <sub>6</sub> N <sub>4</sub> Pt <sub>2</sub> |
| Formula weight                                 | 1236.98                                                                       |
| Temperature/K                                  | 150.00                                                                        |
| Crystal system                                 | triclinic                                                                     |
| Space group                                    | P $\bar{1}$                                                                   |
| <i>a</i> /Å                                    | 10.136 1(2)                                                                   |
| <i>b</i> /Å                                    | 14.9235(3)                                                                    |
| <i>c</i> /Å                                    | 27.9163(6)                                                                    |
| $\alpha$ /°                                    | 97.5834(17)                                                                   |
| $\beta$ /°                                     | 97.4100(18)                                                                   |
| $\gamma$ /°                                    | 90.1700(18)                                                                   |
| <i>V</i> /Å <sup>3</sup>                       | 4150.06(16)                                                                   |
| <i>Z</i>                                       | 4                                                                             |
| $\rho_{calc}/g \cdot cm^{-3}$                  | 1.980                                                                         |
| $\mu/mm^{-1}$                                  | 13.046                                                                        |
| <i>F</i> (000)                                 | 2360.0                                                                        |
| Crystal size/mm <sup>3</sup>                   | 0.696 × 0.513 × 0.233                                                         |
| Radiation                                      | Cu–K $\alpha$ ( $\lambda = 1.54184$ Å)                                        |
| $2\theta$ range for data collection/°          | 7.158 to 148.476                                                              |
| Index ranges                                   | $-12 \leq h \leq 12, -18 \leq k \leq 16, -30 \leq l \leq 34$                  |
| Reflections collected                          | 27688                                                                         |
| Independent reflections                        | 16187 [ $R_{int} = 0.0849, R_{sigma} = 0.0681$ ]                              |
| Data/restraints/parameters                     | 16187/852/776                                                                 |
| Goodness-of-fit on $F^2$                       | 1.085                                                                         |
| Final <i>R</i> indexes [ $I \geq 2\sigma(I)$ ] | $R_1 = 0.0849, wR_2 = 0.2293$                                                 |
| Final <i>R</i> indexes [all data]              | $R_1 = 0.0906, wR_2 = 0.2379$                                                 |
| Largest diff. peak/hole / e Å <sup>-3</sup>    | 5.51/−4.46                                                                    |

**Table S2.** Selected bond distances (Å) and bond angles (°) for **2** with estimated standard deviations (e.s.d.s.) in parentheses

|                   |           |                   |           |
|-------------------|-----------|-------------------|-----------|
| Pt(1)–N(1)        | 2.033(8)  | Pt(1)–C(12)       | 1.949(9)  |
| Pt(1)–N(2)        | 2.039(8)  | Pt(1)–C(18)       | 2.049(9)  |
| Pt(2)–N(3)        | 2.045(8)  | Pt(2)–C(49)       | 1.957(9)  |
| Pt(2)–N(4)        | 2.035(8)  | Pt(2)–C(37)       | 2.062(9)  |
| C(18)–C(19)       | 1.207(13) | C(28)–C(29)       | 1.195(15) |
| C(26)–C(27)       | 1.184(15) | C(36)–C(37)       | 1.212(13) |
|                   |           |                   |           |
| N(1)–Pt(1)–N(2)   | 160.2(3)  | N(1)–Pt(1)–C(12)  | 80.8(4)   |
| N(1)–Pt(1)–C(18)  | 100.5(3)  | N(2)–Pt(1)–C(12)  | 79.3(4)   |
| N(2)–Pt(1)–C(18)  | 99.3(3)   | Pt(1)–C(18)–C(19) | 175.0(8)  |
| C(12)–Pt(1)–C(18) | 178.2(4)  | C(37)–Pt(2)–C(49) | 178.5(4)  |
| N(3)–Pt(2)–N(4)   | 160.4(3)  | N(3)–Pt(2)–C(49)  | 80.1(4)   |
| N(3)–Pt(2)–C(37)  | 99.0(3)   | N(4)–Pt(2)–C(49)  | 80.3(4)   |
| N(4)–Pt(2)–C(37)  | 100.6(3)  | Pt(2)–C(37)–C(36) | 177.9(8)  |
| C(26)–C(27)–C(28) | 178.1(11) | C(27)–C(28)–C(29) | 178.6(12) |

**Table S3.** Cartesian coordinates of the optimized ground-state geometry of the open form of **1** in dichloromethane

| Energy = -4642.03829696 Hartree |    |           |           |           |     |    |           |           |           |
|---------------------------------|----|-----------|-----------|-----------|-----|----|-----------|-----------|-----------|
| 1                               | Pt | -1.536839 | -3.138260 | 2.683490  | 54  | C  | 3.208195  | 3.877166  | -1.411238 |
| 2                               | C  | -0.563727 | -4.812014 | 2.953996  | 55  | Pt | 2.059432  | 5.219931  | -2.500905 |
| 3                               | C  | -1.097882 | -5.764057 | 3.823743  | 56  | C  | 0.951137  | 6.449663  | -3.540408 |
| 4                               | C  | 0.646398  | -5.004361 | 2.283740  | 57  | C  | 1.527379  | 7.623843  | -4.027436 |
| 5                               | C  | -0.396847 | -6.957233 | 4.026828  | 58  | C  | -0.390127 | 6.126588  | -3.757530 |
| 6                               | C  | 1.344730  | -6.198167 | 2.490218  | 59  | C  | 0.732679  | 8.505210  | -4.768416 |
| 7                               | C  | 0.812442  | -7.159939 | 3.355522  | 60  | C  | -1.181546 | 7.011260  | -4.496125 |
| 8                               | H  | -0.773661 | -7.730331 | 4.697130  | 61  | C  | -0.609096 | 8.186176  | -4.995274 |
| 9                               | H  | 2.294093  | -6.394517 | 1.992181  | 62  | H  | 1.138538  | 9.432467  | -5.173549 |
| 10                              | H  | 1.357093  | -8.087805 | 3.515975  | 63  | H  | -2.233268 | 6.803738  | -4.692152 |
| 11                              | N  | 0.104955  | -2.825549 | 1.457942  | 64  | H  | -1.226182 | 8.871833  | -5.571870 |
| 12                              | C  | 1.018642  | -3.854750 | 1.452935  | 65  | N  | 3.432993  | 6.719429  | -2.899790 |
| 13                              | C  | 0.348432  | -1.715585 | 0.747697  | 66  | C  | 2.934311  | 7.764004  | -3.642921 |
| 14                              | C  | 2.193602  | -3.734910 | 0.718391  | 67  | C  | 4.707786  | 6.746064  | -2.485971 |
| 15                              | C  | 1.500829  | -1.555723 | -0.006321 | 68  | C  | 3.753357  | 8.842327  | -3.961223 |
| 16                              | H  | -0.412637 | -0.939682 | 0.804643  | 69  | C  | 5.560378  | 7.798304  | -2.779255 |
| 17                              | C  | 2.439591  | -2.579918 | -0.014182 | 70  | H  | 5.032267  | 5.887933  | -1.903034 |
| 18                              | H  | 2.913271  | -4.549948 | 0.730848  | 71  | C  | 5.072268  | 8.861958  | -3.529538 |
| 19                              | H  | 1.654485  | -0.632068 | -0.557307 | 72  | H  | 3.348394  | 9.660516  | -4.551243 |
| 20                              | H  | 3.362568  | -2.477975 | -0.580377 | 73  | H  | 6.584694  | 7.774748  | -2.421494 |
| 21                              | N  | -2.785343 | -4.083492 | 4.039599  | 74  | H  | 5.713917  | 9.703677  | -3.776882 |
| 22                              | C  | -3.919062 | -3.578243 | 4.545873  | 75  | N  | 0.250903  | 4.208962  | -2.479868 |
| 23                              | C  | -2.353031 | -5.326289 | 4.439769  | 76  | C  | -0.774090 | 4.859121  | -3.128276 |
| 24                              | C  | -4.687655 | -4.264853 | 5.471962  | 77  | C  | 0.015212  | 3.043274  | -1.862956 |
| 25                              | H  | -4.198461 | -2.592061 | 4.183608  | 78  | C  | -2.053372 | 4.313097  | -3.125063 |
| 26                              | C  | -3.090465 | -6.051476 | 5.370048  | 79  | C  | -1.239429 | 2.453334  | -1.847062 |
| 27                              | C  | -4.263081 | -5.520939 | 5.889774  | 80  | H  | 0.869786  | 2.590876  | -1.362817 |
| 28                              | H  | -5.597679 | -3.813951 | 5.854608  | 81  | C  | -2.290684 | 3.105316  | -2.479713 |
| 29                              | H  | -2.737538 | -7.032109 | 5.679590  | 82  | H  | -2.858989 | 4.843373  | -3.627380 |
| 30                              | H  | -4.840634 | -6.084771 | 6.617729  | 83  | H  | -1.377532 | 1.508889  | -1.328431 |
| 31                              | C  | -2.563104 | -1.364428 | 2.356040  | 84  | H  | -3.291386 | 2.679447  | -2.467582 |
| 32                              | C  | -3.128774 | -0.297477 | 2.102538  | 85  | O  | 7.634443  | 0.193757  | 0.357024  |
| 33                              | C  | -3.706306 | 0.957358  | 1.754361  | 86  | O  | 3.477048  | -0.421396 | 2.532554  |
| 34                              | C  | -5.099164 | 1.104524  | 1.663351  | 87  | C  | 8.473735  | 0.879925  | -0.565387 |
| 35                              | C  | -2.861745 | 2.053701  | 1.458768  | 88  | H  | 8.045087  | 0.818460  | -1.578830 |
| 36                              | C  | -5.640848 | 2.323242  | 1.261776  | 89  | H  | 8.535757  | 1.946014  | -0.292985 |
| 37                              | H  | -5.729666 | 0.252289  | 1.895823  | 90  | C  | 9.836532  | 0.233860  | -0.519696 |
| 38                              | C  | -3.439920 | 3.283986  | 1.053798  | 91  | H  | 9.735507  | -0.833018 | -0.767707 |
| 39                              | C  | -4.815337 | 3.414563  | 0.949299  | 92  | H  | 10.221832 | 0.284205  | 0.509321  |
| 40                              | H  | -5.285530 | 4.342293  | 0.637617  | 93  | C  | 10.811972 | 0.901628  | -1.476233 |
| 41                              | C  | -1.456184 | 1.931612  | 1.492349  | 94  | H  | 10.412926 | 0.854453  | -2.502435 |
| 42                              | C  | -0.237663 | 1.847185  | 1.449284  | 95  | H  | 10.893134 | 1.973117  | -1.231591 |
| 43                              | C  | 1.110205  | 1.711092  | 1.328265  | 96  | C  | 12.195035 | 0.270226  | -1.442848 |
| 44                              | C  | 2.309259  | 1.549509  | 1.155701  | 97  | H  | 12.112408 | -0.802592 | -1.682627 |
| 45                              | C  | 3.677013  | 1.272947  | 0.944999  | 98  | H  | 12.593801 | 0.319505  | -0.416341 |
| 46                              | C  | 4.441325  | 1.988898  | -0.006456 | 99  | C  | 13.177519 | 0.927339  | -2.399218 |
| 47                              | C  | 4.281826  | 0.206763  | 1.659114  | 100 | H  | 12.778065 | 0.876805  | -3.425681 |
| 48                              | C  | 5.787257  | 1.651174  | -0.216910 | 101 | H  | 13.257755 | 2.000821  | -2.160577 |
| 49                              | C  | 5.605376  | -0.132546 | 1.430319  | 102 | C  | 14.561502 | 0.298085  | -2.365070 |
| 50                              | C  | 6.356132  | 0.598340  | 0.496388  | 103 | H  | 14.480398 | -0.776003 | -2.601009 |
| 51                              | H  | 6.356933  | 2.214164  | -0.949329 | 104 | H  | 14.961440 | 0.350374  | -1.338844 |
| 52                              | H  | 6.092484  | -0.946053 | 1.959468  | 105 | C  | 15.544702 | 0.951498  | -3.323565 |
| 53                              | C  | 3.821839  | 3.022864  | -0.766157 | 106 | H  | 15.144397 | 0.899071  | -4.349692 |

|     |   |            |           |           |     |   |            |           |           |
|-----|---|------------|-----------|-----------|-----|---|------------|-----------|-----------|
| 107 | H | 15.625980  | 2.025639  | -3.087888 | 160 | H | -21.765911 | -0.099560 | -0.235488 |
| 108 | C | 16.928489  | 0.321750  | -3.289871 | 161 | H | -22.443418 | -1.346999 | 0.821620  |
| 109 | H | 16.846617  | -0.752711 | -3.523991 | 162 | H | -21.899406 | 0.194140  | 1.502876  |
| 110 | H | 17.329600  | 0.375330  | -2.264133 | 163 | C | -3.026630  | 5.482882  | 0.215935  |
| 111 | C | 17.911147  | 0.972999  | -4.250452 | 164 | H | -3.738703  | 5.971762  | 0.900062  |
| 112 | H | 17.508775  | 0.920631  | -5.275813 | 165 | H | -3.557885  | 5.273777  | -0.729422 |
| 113 | H | 17.994404  | 2.047199  | -4.015606 | 166 | C | -1.818288  | 6.355173  | -0.022778 |
| 114 | C | 19.294009  | 0.341451  | -4.219499 | 167 | H | -1.345053  | 6.585950  | 0.942647  |
| 115 | H | 19.698366  | 0.394007  | -3.194846 | 168 | H | -1.078445  | 5.780323  | -0.602610 |
| 116 | H | 19.211254  | -0.733024 | -4.453830 | 169 | C | -2.166682  | 7.637299  | -0.760060 |
| 117 | C | 20.276572  | 0.991319  | -5.182191 | 170 | H | -2.593713  | 7.384973  | -1.746570 |
| 118 | H | 19.868594  | 0.940470  | -6.203564 | 171 | H | -2.957079  | 8.180847  | -0.216685 |
| 119 | H | 20.360072  | 2.063098  | -4.944346 | 172 | C | -0.962133  | 8.544722  | -0.955994 |
| 120 | C | 21.650380  | 0.344776  | -5.142969 | 173 | H | -0.548502  | 8.824349  | 0.026671  |
| 121 | H | 22.348116  | 0.817154  | -5.844142 | 174 | H | -0.167399  | 7.978069  | -1.471661 |
| 122 | H | 22.091422  | 0.414069  | -4.139776 | 175 | C | -1.279423  | 9.796922  | -1.756967 |
| 123 | H | 21.592713  | -0.721056 | -5.400726 | 176 | H | -2.058984  | 10.382653 | -1.241895 |
| 124 | O | -6.961827  | 2.558563  | 1.133266  | 177 | H | -1.713914  | 9.498719  | -2.726411 |
| 125 | O | -2.561798  | 4.263494  | 0.779150  | 178 | C | -0.065073  | 10.676100 | -2.010651 |
| 126 | C | -7.877234  | 1.498349  | 1.387348  | 179 | H | 0.339605   | 11.038279 | -1.051241 |
| 127 | H | -7.660890  | 0.649389  | 0.718492  | 180 | H | 0.734301   | 10.063060 | -2.463925 |
| 128 | H | -7.764072  | 1.144359  | 2.424801  | 181 | C | -0.363388  | 11.856963 | -2.920679 |
| 129 | C | -9.269278  | 2.028881  | 1.147971  | 182 | H | -1.165804  | 12.470636 | -2.478686 |
| 130 | H | -9.325058  | 2.429557  | 0.125142  | 183 | H | -0.766615  | 11.480135 | -3.876494 |
| 131 | H | -9.452893  | 2.873739  | 1.828010  | 184 | C | 0.848703   | 12.731736 | -3.198480 |
| 132 | C | -10.331228 | 0.958483  | 1.344016  | 185 | H | 1.245396   | 13.123019 | -2.247170 |
| 133 | H | -10.134675 | 0.116016  | 0.661137  | 186 | H | 1.655104   | 12.111277 | -3.625231 |
| 134 | H | -10.258807 | 0.545725  | 2.363179  | 187 | C | 0.553865   | 13.889462 | -4.139497 |
| 135 | C | -11.739031 | 1.482693  | 1.108091  | 188 | H | -0.246956  | 14.514363 | -3.710693 |
| 136 | H | -11.801118 | 1.915181  | 0.095972  | 189 | H | 0.150808   | 13.494987 | -5.087235 |
| 137 | H | -11.939809 | 2.314666  | 1.802905  | 190 | C | 1.768559   | 14.756084 | -4.431614 |
| 138 | C | -12.814417 | 0.419878  | 1.267592  | 191 | H | 2.169499   | 15.156402 | -3.485573 |
| 139 | H | -12.615926 | -0.408766 | 0.567741  | 192 | H | 2.571583   | 14.130142 | -4.855659 |
| 140 | H | -12.751249 | -0.018152 | 2.277410  | 193 | C | 1.475314   | 15.907940 | -5.381489 |
| 141 | C | -14.219276 | 0.952926  | 1.034036  | 194 | H | 0.672917   | 16.530937 | -4.957052 |
| 142 | H | -14.275884 | 1.403536  | 0.029224  | 195 | H | 1.075958   | 15.505249 | -6.325286 |
| 143 | H | -14.420474 | 1.774145  | 1.741870  | 196 | C | 2.699311   | 16.762551 | -5.662094 |
| 144 | C | -15.300854 | -0.106990 | 1.171090  | 197 | H | 2.475776   | 17.590839 | -6.344328 |
| 145 | H | -15.103655 | -0.924722 | 0.458071  | 198 | H | 3.099703   | 17.195324 | -4.735866 |
| 146 | H | -15.242703 | -0.562813 | 2.173423  | 199 | H | 3.501535   | 16.166244 | -6.116574 |
| 147 | C | -16.703530 | 0.434282  | 0.943088  | 200 | C | 3.932741   | -1.596300 | 3.190791  |
| 148 | H | -16.757577 | 0.899681  | -0.055122 | 201 | H | 4.823128   | -1.370337 | 3.799416  |
| 149 | H | -16.903034 | 1.245746  | 1.662596  | 202 | H | 4.219931   | -2.353092 | 2.439973  |
| 150 | C | -17.788152 | -0.624502 | 1.064065  | 203 | C | 2.795710   | -2.090601 | 4.051843  |
| 151 | H | -17.593605 | -1.431408 | 0.338074  | 204 | H | 2.567804   | -1.331091 | 4.813939  |
| 152 | H | -17.729815 | -1.096405 | 2.058975  | 205 | H | 1.893944   | -2.182435 | 3.425045  |
| 153 | C | -19.190325 | -0.077815 | 0.846964  | 206 | C | 3.098099   | -3.424907 | 4.713280  |
| 154 | H | -19.246933 | 0.403707  | -0.143556 | 207 | H | 3.279771   | -4.186138 | 3.934352  |
| 155 | H | -19.388928 | 0.722052  | 1.579735  | 208 | H | 4.032060   | -3.355314 | 5.294871  |
| 156 | C | -20.275763 | -1.138356 | 0.953177  | 209 | C | 1.965690   | -3.892137 | 5.614558  |
| 157 | H | -20.208889 | -1.626615 | 1.937745  | 210 | H | 1.800587   | -3.147813 | 6.410704  |
| 158 | H | -20.081824 | -1.928763 | 0.211667  | 211 | H | 1.030764   | -3.922232 | 5.028051  |
| 159 | C | -21.670715 | -0.572611 | 0.750931  | 212 | C | 2.208540   | -5.259346 | 6.232853  |

|     |   |           |            |           |
|-----|---|-----------|------------|-----------|
| 213 | H | 2.394156  | -5.989229  | 5.426609  |
| 214 | H | 3.128324  | -5.236862  | 6.840735  |
| 215 | C | 1.045986  | -5.745750  | 7.083279  |
| 216 | H | 0.884639  | -5.050071  | 7.923250  |
| 217 | H | 0.121241  | -5.711022  | 6.480364  |
| 218 | C | 1.237567  | -7.156115  | 7.617244  |
| 219 | H | 2.163966  | -7.203029  | 8.213416  |
| 220 | H | 1.392285  | -7.845750  | 6.769325  |
| 221 | C | 0.068965  | -7.645388  | 8.457981  |
| 222 | H | -0.080003 | -6.961564  | 9.309961  |
| 223 | H | -0.858334 | -7.585811  | 7.862333  |
| 224 | C | 0.247055  | -9.064545  | 8.974363  |
| 225 | H | 1.179213  | -9.125253  | 9.560225  |
| 226 | H | 0.384850  | -9.749452  | 8.121040  |
| 227 | C | -0.915563 | -9.547882  | 9.826865  |
| 228 | H | -1.849900 | -9.483458  | 9.244304  |
| 229 | H | -1.049735 | -8.866025  | 10.683090 |
| 230 | C | -0.739451 | -10.969599 | 10.339193 |
| 231 | H | 0.196332  | -11.032317 | 10.915938 |
| 232 | H | -0.610953 | -11.649349 | 9.482621  |
| 233 | C | -1.905353 | -11.433227 | 11.195161 |
| 234 | H | -2.846117 | -11.406993 | 10.629409 |
| 235 | H | -1.767159 | -12.457964 | 11.559022 |
| 236 | H | -2.034070 | -10.785109 | 12.072084 |

**Table S4.** Cartesian coordinates of the optimized ground-state geometry of the closed form of **1** in dichloromethane

| Energy = -4642.04582043 Hartrees |    |           |           |           |     |    |           |           |           |
|----------------------------------|----|-----------|-----------|-----------|-----|----|-----------|-----------|-----------|
| 1                                | Pt | -3.020472 | -3.593160 | 1.447847  | 54  | C  | 1.917646  | -3.016856 | -0.528916 |
| 2                                | C  | -2.453559 | -5.378089 | 2.007680  | 55  | Pt | 0.458826  | -4.470731 | -0.776867 |
| 3                                | C  | -3.332127 | -6.448623 | 1.835464  | 56  | C  | -0.920208 | -5.822376 | -1.081095 |
| 4                                | C  | -1.182860 | -5.533728 | 2.565857  | 57  | C  | -0.667048 | -7.140912 | -0.699207 |
| 5                                | C  | -2.917470 | -7.727349 | 2.223513  | 58  | C  | -2.124823 | -5.430664 | -1.669345 |
| 6                                | C  | -0.770345 | -6.813069 | 2.946807  | 59  | C  | -1.657438 | -8.105538 | -0.913417 |
| 7                                | C  | -1.643963 | -7.892821 | 2.773910  | 60  | C  | -3.113602 | -6.396678 | -1.877020 |
| 8                                | H  | -3.563508 | -8.596167 | 2.097256  | 61  | C  | -2.865862 | -7.721479 | -1.500687 |
| 9                                | H  | 0.218876  | -6.986874 | 3.371795  | 62  | H  | -1.507352 | -9.146423 | -0.627019 |
| 10                               | H  | -1.318728 | -8.888311 | 3.068944  | 63  | H  | -4.074919 | -6.138647 | -2.322771 |
| 11                               | N  | -1.117916 | -3.178341 | 2.155794  | 64  | H  | -3.638956 | -8.469849 | -1.662031 |
| 12                               | C  | -0.441612 | -4.271741 | 2.643253  | 65  | N  | 1.396392  | -6.152849 | -0.005109 |
| 13                               | C  | -0.525402 | -1.976517 | 2.154507  | 66  | C  | 0.648755  | -7.304436 | -0.077261 |
| 14                               | C  | 0.839659  | -4.122211 | 3.163605  | 67  | C  | 2.607216  | -6.180831 | 0.571203  |
| 15                               | C  | 0.751816  | -1.780117 | 2.657851  | 68  | C  | 1.154040  | -8.494191 | 0.440609  |
| 16                               | H  | -1.108175 | -1.159905 | 1.731499  | 69  | C  | 3.148493  | -7.338997 | 1.105270  |
| 17                               | C  | 1.440038  | -2.870260 | 3.176510  | 70  | H  | 3.139404  | -5.232724 | 0.594469  |
| 18                               | H  | 1.356934  | -4.994497 | 3.556317  | 71  | C  | 2.407274  | -8.514540 | 1.034839  |
| 19                               | H  | 1.190092  | -0.786902 | 2.629713  | 72  | H  | 0.550463  | -9.396476 | 0.381393  |
| 20                               | H  | 2.441430  | -2.748438 | 3.581825  | 73  | H  | 4.133005  | -7.311871 | 1.561488  |
| 21                               | N  | -4.691631 | -4.704125 | 0.927654  | 74  | H  | 2.803058  | -9.441232 | 1.442463  |
| 22                               | C  | -5.794278 | -4.227838 | 0.331570  | 75  | N  | -1.029592 | -3.305563 | -1.619309 |
| 23                               | C  | -4.592851 | -6.046935 | 1.207309  | 76  | C  | -2.170761 | -3.994021 | -1.957532 |
| 24                               | C  | -6.857764 | -5.042323 | -0.022354 | 77  | C  | -0.968730 | -1.980793 | -1.811651 |
| 25                               | H  | -5.800266 | -3.157238 | 0.140035  | 78  | C  | -3.248115 | -3.318510 | -2.521551 |
| 26                               | C  | -5.638584 | -6.903745 | 0.873662  | 79  | C  | -2.019514 | -1.264437 | -2.363468 |
| 27                               | C  | -6.775622 | -6.402814 | 0.256871  | 80  | H  | -0.041128 | -1.499292 | -1.506828 |
| 28                               | H  | -7.729651 | -4.609569 | -0.502674 | 81  | C  | -3.174372 | -1.947153 | -2.726840 |
| 29                               | H  | -5.546819 | -7.963604 | 1.097497  | 82  | H  | -4.141206 | -3.875872 | -2.793010 |
| 30                               | H  | -7.592604 | -7.069964 | -0.005847 | 83  | H  | -1.924358 | -0.190622 | -2.494007 |
| 31                               | C  | -3.615468 | -1.677916 | 0.914652  | 84  | H  | -4.016076 | -1.413977 | -3.161928 |
| 32                               | C  | -3.925321 | -0.517053 | 0.633876  | 85  | O  | 7.338302  | -0.487509 | -0.425599 |
| 33                               | C  | -4.227764 | 0.836304  | 0.311186  | 86  | O  | 3.762256  | 2.545984  | 0.190823  |
| 34                               | C  | -5.563377 | 1.255790  | 0.199587  | 87  | C  | 7.847204  | -1.805496 | -0.597920 |
| 35                               | C  | -3.180314 | 1.765117  | 0.109319  | 88  | H  | 7.524809  | -2.442574 | 0.241928  |
| 36                               | C  | -5.851929 | 2.582650  | -0.109654 | 89  | H  | 7.444810  | -2.245347 | -1.524696 |
| 37                               | H  | -6.350484 | 0.526287  | 0.361154  | 90  | C  | 9.352316  | -1.716354 | -0.654320 |
| 38                               | C  | -3.504336 | 3.114616  | -0.188369 | 91  | H  | 9.713787  | -1.216362 | 0.256192  |
| 39                               | C  | -4.824123 | 3.518914  | -0.300883 | 92  | H  | 9.643441  | -1.078033 | -1.501376 |
| 40                               | H  | -5.094783 | 4.543370  | -0.538475 | 93  | C  | 9.997055  | -3.087245 | -0.785432 |
| 41                               | C  | -1.819590 | 1.386607  | 0.155575  | 94  | H  | 9.700668  | -3.715708 | 0.069995  |
| 42                               | C  | -0.624082 | 1.130325  | 0.132063  | 95  | H  | 9.609029  | -3.595035 | -1.683163 |
| 43                               | C  | 0.705235  | 0.843401  | 0.073349  | 96  | C  | 11.514289 | -3.018279 | -0.858843 |
| 44                               | C  | 1.897778  | 0.584161  | -0.002512 | 97  | H  | 11.897803 | -2.485942 | 0.027045  |
| 45                               | C  | 3.272061  | 0.273031  | -0.101772 | 98  | H  | 11.810411 | -2.408288 | -1.727876 |
| 46                               | C  | 3.704110  | -1.060744 | -0.309625 | 99  | C  | 12.174804 | -4.384708 | -0.949873 |
| 47                               | C  | 4.243636  | 1.303880  | -0.010619 | 100 | H  | 11.882739 | -4.990093 | -0.075787 |
| 48                               | C  | 5.074422  | -1.346595 | -0.415966 | 101 | H  | 11.786627 | -4.922092 | -1.830850 |
| 49                               | C  | 5.593087  | 1.010238  | -0.131192 | 102 | C  | 13.691625 | -4.312713 | -1.029098 |
| 50                               | C  | 6.004659  | -0.315701 | -0.329472 | 103 | H  | 14.076412 | -3.760275 | -0.155785 |
| 51                               | H  | 5.378357  | -2.376119 | -0.576735 | 104 | H  | 13.983716 | -3.719504 | -1.911447 |
| 52                               | H  | 6.359558  | 1.776287  | -0.075049 | 105 | C  | 14.359393 | -5.677349 | -1.094414 |
| 53                               | C  | 2.754106  | -2.115104 | -0.427685 | 106 | H  | 14.069194 | -6.268497 | -0.209927 |

|     |   |            |           |           |     |   |            |           |           |
|-----|---|------------|-----------|-----------|-----|---|------------|-----------|-----------|
| 107 | H | 13.974368  | -6.232498 | -1.965847 | 160 | H | -22.043568 | 2.271392  | -2.561643 |
| 108 | C | 15.876045  | -5.601071 | -1.173939 | 161 | H | -22.942558 | 1.265647  | -1.415252 |
| 109 | H | 16.258808  | -5.038092 | -0.306444 | 162 | H | -22.259630 | 2.812137  | -0.891741 |
| 110 | H | 16.166388  | -5.016133 | -2.062444 | 163 | C | -2.637160  | 5.297947  | -0.668915 |
| 111 | C | 16.548663  | -6.963975 | -1.225418 | 164 | H | -3.290911  | 5.776607  | 0.077644  |
| 112 | H | 16.257650  | -7.548755 | -0.336944 | 165 | H | -3.126797  | 5.387687  | -1.652541 |
| 113 | H | 16.167894  | -7.527588 | -2.093352 | 166 | C | -1.263707  | 5.923803  | -0.669419 |
| 114 | C | 18.065196  | -6.884153 | -1.301328 | 167 | H | -0.839489  | 5.828321  | 0.341118  |
| 115 | H | 18.357298  | -6.300833 | -2.190505 | 168 | H | -0.612609  | 5.337687  | -1.334187 |
| 116 | H | 18.445582  | -6.318587 | -0.434327 | 169 | C | -1.256949  | 7.381497  | -1.096914 |
| 117 | C | 18.741769  | -8.246021 | -1.348802 | 170 | H | -1.569544  | 7.463127  | -2.150187 |
| 118 | H | 18.445602  | -8.827766 | -0.462127 | 171 | H | -1.997587  | 7.951207  | -0.512682 |
| 119 | H | 18.363663  | -8.807398 | -2.217209 | 172 | C | 0.119129   | 8.003150  | -0.914292 |
| 120 | C | 20.255796  | -8.145464 | -1.418309 | 173 | H | 0.375148   | 7.988102  | 0.158196  |
| 121 | H | 20.733306  | -9.131384 | -1.456355 | 174 | H | 0.872869   | 7.368509  | -1.409742 |
| 122 | H | 20.573761  | -7.589161 | -2.310015 | 175 | C | 0.239487   | 9.424036  | -1.439201 |
| 123 | H | 20.657039  | -7.616203 | -0.543923 | 176 | H | -0.569128  | 10.044185 | -1.018344 |
| 124 | O | -7.100735  | 3.072132  | -0.248711 | 177 | H | 0.086990   | 9.429027  | -2.530904 |
| 125 | O | -2.446434  | 3.926061  | -0.345946 | 178 | C | 1.581760   | 10.055005 | -1.104071 |
| 126 | C | -8.201380  | 2.183831  | -0.091765 | 179 | H | 1.691912   | 10.095963 | -0.006679 |
| 127 | H | -8.104578  | 1.341587  | -0.795877 | 180 | H | 2.396417   | 9.401267  | -1.462088 |
| 128 | H | -8.203868  | 1.767601  | 0.928744  | 181 | C | 1.768815   | 11.450374 | -1.677045 |
| 129 | C | -9.469850  | 2.954897  | -0.361878 | 182 | H | 0.919888   | 12.086176 | -1.375397 |
| 130 | H | -9.420703  | 3.377376  | -1.376321 | 183 | H | 1.735012   | 11.405102 | -2.778113 |
| 131 | H | -9.532183  | 3.805042  | 0.332964  | 184 | C | 3.066749   | 12.103685 | -1.230080 |
| 132 | C | -10.698539 | 2.069673  | -0.222706 | 185 | H | 3.078968   | 12.157908 | -0.127444 |
| 133 | H | -10.594664 | 1.193310  | -0.883130 | 186 | H | 3.918993   | 11.457235 | -1.504495 |
| 134 | H | -10.750085 | 1.670239  | 0.803072  | 187 | C | 3.279738   | 13.496744 | -1.800588 |
| 135 | C | -11.996199 | 2.791343  | -0.550903 | 188 | H | 2.402759   | 14.123096 | -1.566721 |
| 136 | H | -11.944401 | 3.183718  | -1.579786 | 189 | H | 3.325203   | 13.442148 | -2.900953 |
| 137 | H | -12.103298 | 3.672310  | 0.102796  | 190 | C | 4.533524   | 14.173872 | -1.270113 |
| 138 | C | -13.220957 | 1.901161  | -0.410072 | 191 | H | 4.475844   | 14.232224 | -0.168623 |
| 139 | H | -13.096521 | 1.008767  | -1.045822 | 192 | H | 5.413117   | 13.543612 | -1.488248 |
| 140 | H | -13.282344 | 1.525498  | 0.624733  | 193 | C | 4.760188   | 15.568759 | -1.832927 |
| 141 | C | -14.523250 | 2.597534  | -0.772822 | 194 | H | 3.859617   | 16.178145 | -1.660397 |
| 142 | H | -14.461497 | 2.970090  | -1.808817 | 195 | H | 4.876463   | 15.505326 | -2.925789 |
| 143 | H | -14.651036 | 3.491103  | -0.139664 | 196 | C | 5.968128   | 16.256517 | -1.220214 |
| 144 | C | -15.741910 | 1.698533  | -0.632205 | 197 | H | 6.137424   | 17.251975 | -1.646783 |
| 145 | H | -15.605127 | 0.799627  | -1.256217 | 198 | H | 5.840161   | 16.379186 | -0.134872 |
| 146 | H | -15.809126 | 1.334348  | 0.406433  | 199 | H | 6.882922   | 15.668711 | -1.378378 |
| 147 | C | -17.046784 | 2.380537  | -1.012867 | 200 | C | 4.685882   | 3.629136  | 0.211378  |
| 148 | H | -16.978976 | 2.744578  | -2.051542 | 201 | H | 5.210457   | 3.683335  | -0.756803 |
| 149 | H | -17.186589 | 3.278877  | -0.388918 | 202 | H | 5.444562   | 3.458430  | 0.991898  |
| 150 | C | -18.260998 | 1.475059  | -0.874604 | 203 | C | 3.939464   | 4.911913  | 0.489680  |
| 151 | H | -18.117027 | 0.574706  | -1.494908 | 204 | H | 3.115951   | 5.024665  | -0.230529 |
| 152 | H | -18.330918 | 1.114183  | 0.165055  | 205 | H | 3.482751   | 4.854187  | 1.488534  |
| 153 | C | -19.567322 | 2.149874  | -1.262574 | 206 | C | 4.887524   | 6.100965  | 0.407291  |
| 154 | H | -19.497905 | 2.512061  | -2.301922 | 207 | H | 5.795252   | 5.882202  | 0.993902  |
| 155 | H | -19.714277 | 3.049362  | -0.641632 | 208 | H | 5.227345   | 6.223568  | -0.633672 |
| 156 | C | -20.780218 | 1.241122  | -1.127017 | 209 | C | 4.293387   | 7.409437  | 0.906385  |
| 157 | H | -20.847510 | 0.880995  | -0.088734 | 210 | H | 3.353657   | 7.624904  | 0.371224  |
| 158 | H | -20.630518 | 0.343610  | -1.747082 | 211 | H | 4.018092   | 7.299797  | 1.967954  |
| 159 | C | -22.076489 | 1.929490  | -1.518690 | 212 | C | 5.256050   | 8.577812  | 0.748403  |

|     |   |          |           |           |
|-----|---|----------|-----------|-----------|
| 213 | H | 6.240727 | 8.288753  | 1.153034  |
| 214 | H | 5.420967 | 8.773879  | -0.324864 |
| 215 | C | 4.803032 | 9.858672  | 1.431774  |
| 216 | H | 3.824843 | 10.171925 | 1.027625  |
| 217 | H | 4.637182 | 9.660946  | 2.503679  |
| 218 | C | 5.805488 | 10.992195 | 1.277098  |
| 219 | H | 5.949038 | 11.210480 | 0.204511  |
| 220 | H | 6.789345 | 10.657112 | 1.646762  |
| 221 | C | 5.410666 | 12.270673 | 1.999009  |
| 222 | H | 4.447568 | 12.635134 | 1.601281  |
| 223 | H | 5.231537 | 12.052299 | 3.064782  |
| 224 | C | 6.456142 | 13.368099 | 1.875966  |
| 225 | H | 6.676681 | 13.543484 | 0.808539  |
| 226 | H | 7.402141 | 13.021316 | 2.324241  |
| 227 | C | 6.041794 | 14.681658 | 2.518775  |
| 228 | H | 5.745479 | 14.505769 | 3.566403  |
| 229 | H | 5.137982 | 15.065493 | 2.013182  |
| 230 | C | 7.132347 | 15.741440 | 2.474354  |
| 231 | H | 7.467185 | 15.869887 | 1.432439  |
| 232 | H | 8.011041 | 15.378140 | 3.029086  |
| 233 | C | 6.677160 | 17.076347 | 3.037496  |
| 234 | H | 6.346516 | 16.974248 | 4.079698  |
| 235 | H | 7.475311 | 17.827364 | 3.015480  |
| 236 | H | 5.828933 | 17.477305 | 2.465979  |



**Table S5.** Cartesian coordinates of the optimized ground-state geometry of the open form of **3** in dichloromethane

| Energy = -5944.48838658 Hartrees |    |           |           |           |     |   |            |           |           |
|----------------------------------|----|-----------|-----------|-----------|-----|---|------------|-----------|-----------|
| 1                                | Pt | 4.608124  | 2.604801  | -0.470329 | 54  | C | -6.601867  | -5.386206 | -0.866860 |
| 2                                | C  | 4.845309  | 4.473266  | -0.986428 | 55  | C | -4.260941  | -5.833378 | -1.440552 |
| 3                                | C  | 6.077785  | 5.083021  | -0.747445 | 56  | C | -6.932073  | -6.708816 | -1.167799 |
| 4                                | C  | 3.773890  | 5.148343  | -1.580561 | 57  | C | -4.588267  | -7.153827 | -1.735944 |
| 5                                | C  | 6.250214  | 6.420715  | -1.106715 | 58  | C | -5.918746  | -7.571502 | -1.592474 |
| 6                                | C  | 3.941280  | 6.485293  | -1.930451 | 59  | H | -7.951072  | -7.080277 | -1.077502 |
| 7                                | C  | 5.178597  | 7.100109  | -1.689877 | 60  | H | -3.840456  | -7.870116 | -2.076599 |
| 8                                | H  | 7.190806  | 6.943499  | -0.938129 | 61  | N | -6.842100  | -3.124708 | -0.146770 |
| 9                                | H  | 3.137059  | 7.069107  | -2.378564 | 62  | C | -7.484758  | -4.308530 | -0.405415 |
| 10                               | N  | 2.737391  | 3.019494  | -1.253065 | 63  | C | -7.561572  | -2.078017 | 0.283599  |
| 11                               | C  | 2.580586  | 4.303439  | -1.723697 | 64  | C | -8.863155  | -4.412371 | -0.246432 |
| 12                               | C  | 1.698880  | 2.178986  | -1.313527 | 65  | C | -8.931358  | -2.137495 | 0.452703  |
| 13                               | C  | 1.371664  | 4.704841  | -2.268915 | 66  | H | -7.000260  | -1.168127 | 0.481270  |
| 14                               | C  | 0.472050  | 2.542684  | -1.848460 | 67  | C | -9.626222  | -3.320297 | 0.169846  |
| 15                               | H  | 1.871420  | 1.180424  | -0.916053 | 68  | H | -9.332859  | -5.365823 | -0.476414 |
| 16                               | C  | 0.283084  | 3.827333  | -2.357869 | 69  | H | -9.450353  | -1.244030 | 0.789028  |
| 17                               | H  | 1.289441  | 5.723703  | -2.643433 | 70  | N | -2.959460  | -3.851006 | -1.139276 |
| 18                               | H  | -0.321649 | 1.801516  | -1.853064 | 71  | C | -2.954013  | -5.168735 | -1.534484 |
| 19                               | N  | 6.564709  | 2.916162  | 0.135073  | 72  | C | -1.821328  | -3.151392 | -1.208979 |
| 20                               | C  | 7.368261  | 2.026565  | 0.728910  | 73  | C | -1.786580  | -5.754508 | -1.996936 |
| 21                               | C  | 7.038333  | 4.186738  | -0.094116 | 74  | C | -0.634339  | -3.696396 | -1.675189 |
| 22                               | C  | 8.659964  | 2.332859  | 1.128090  | 75  | H | -1.877746  | -2.116134 | -0.875744 |
| 23                               | H  | 6.945329  | 1.036824  | 0.883297  | 76  | C | -0.592817  | -5.028067 | -2.091326 |
| 24                               | C  | 8.321242  | 4.535558  | 0.296417  | 77  | H | -1.821608  | -6.798640 | -2.301439 |
| 25                               | C  | 9.170090  | 3.615485  | 0.920760  | 78  | H | 0.244776   | -3.058847 | -1.702618 |
| 26                               | H  | 9.248644  | 1.554427  | 1.602584  | 79  | O | -5.189049  | 4.687420  | 0.638357  |
| 27                               | H  | 8.654866  | 5.554665  | 0.107668  | 80  | O | -0.690639  | 3.312745  | 1.163503  |
| 28                               | C  | 4.375279  | 0.602753  | 0.013745  | 81  | C | -6.566485  | 4.396759  | 0.426026  |
| 29                               | C  | 4.240584  | -0.603288 | 0.234567  | 82  | H | -6.702666  | 3.930131  | -0.563009 |
| 30                               | C  | 4.080347  | -2.001975 | 0.455747  | 83  | H | -6.916481  | 3.678623  | 1.185064  |
| 31                               | C  | 5.207517  | -2.829903 | 0.433010  | 84  | C | -7.336859  | 5.690713  | 0.519465  |
| 32                               | C  | 2.778704  | -2.545134 | 0.672825  | 85  | H | -6.961804  | 6.389461  | -0.242677 |
| 33                               | C  | 5.059086  | -4.206815 | 0.602381  | 86  | H | -7.140185  | 6.153666  | 1.497529  |
| 34                               | H  | 6.180002  | -2.377762 | 0.265037  | 87  | C | -8.830132  | 5.466814  | 0.338822  |
| 35                               | C  | 2.661465  | -3.947652 | 0.855126  | 88  | H | -9.016094  | 4.983678  | -0.634077 |
| 36                               | C  | 3.792924  | -4.752757 | 0.813582  | 89  | H | -9.188631  | 4.757098  | 1.101962  |
| 37                               | H  | 3.684467  | -5.825183 | 0.954691  | 90  | C | -9.640198  | 6.750720  | 0.427627  |
| 38                               | C  | 1.672196  | -1.665234 | 0.633717  | 91  | H | -9.295716  | 7.456038  | -0.346185 |
| 39                               | C  | 0.738976  | -0.875917 | 0.618639  | 92  | H | -9.440477  | 7.242402  | 1.393742  |
| 40                               | C  | -0.318751 | -0.021121 | 0.624076  | 93  | C | -11.135810 | 6.521532  | 0.277059  |
| 41                               | C  | -1.268068 | 0.749508  | 0.638052  | 94  | H | -11.334753 | 6.025226  | -0.687199 |
| 42                               | C  | -2.305694 | 1.706540  | 0.653730  | 95  | H | -11.475624 | 5.815730  | 1.053046  |
| 43                               | C  | -3.651945 | 1.350643  | 0.404146  | 96  | C | -11.956059 | 7.798945  | 0.365544  |
| 44                               | C  | -1.986729 | 3.066835  | 0.908204  | 97  | H | -11.625940 | 8.501495  | -0.417470 |
| 45                               | C  | -4.647419 | 2.340339  | 0.395909  | 98  | H | -11.748768 | 8.300690  | 1.325226  |
| 46                               | C  | -2.976244 | 4.037587  | 0.888656  | 99  | C | -13.452391 | 7.561542  | 0.233939  |
| 47                               | C  | -4.305960 | 3.669667  | 0.630765  | 100 | H | -13.659660 | 7.056259  | -0.723960 |
| 48                               | H  | -5.672836 | 2.042573  | 0.201963  | 101 | H | -13.780715 | 6.860530  | 1.019237  |
| 49                               | H  | -2.761577 | 5.084942  | 1.078567  | 102 | C | -14.277199 | 8.836187  | 0.320183  |
| 50                               | C  | -4.001112 | -0.006901 | 0.152860  | 103 | H | -13.955063 | 9.534501  | -0.470009 |
| 51                               | C  | -4.306784 | -1.179972 | -0.075259 | 104 | H | -14.064288 | 9.345417  | 1.274728  |
| 52                               | Pt | -4.806891 | -3.138076 | -0.535602 | 105 | C | -15.773951 | 8.594705  | 0.200901  |
| 53                               | C  | -5.273541 | -4.976236 | -0.997512 | 106 | H | -15.986615 | 8.080516  | -0.751091 |

|     |   |            |            |           |     |   |            |           |          |
|-----|---|------------|------------|-----------|-----|---|------------|-----------|----------|
| 107 | H | -16.096257 | 7.900400   | 0.994619  | 160 | C | -0.657890  | -5.174427 | 1.812307 |
| 108 | C | -16.599179 | 9.869351   | 0.280289  | 161 | H | -0.798639  | -5.670956 | 0.837735 |
| 109 | H | -16.382315 | 10.387889  | 1.229082  | 162 | H | -0.264963  | -5.935530 | 2.501963 |
| 110 | H | -16.281649 | 10.561295  | -0.517536 | 163 | C | -1.992597  | -4.632971 | 2.302547 |
| 111 | C | -18.097427 | 9.628557   | 0.170352  | 164 | H | -1.879933  | -4.211468 | 3.314194 |
| 112 | H | -18.310788 | 9.102669   | -0.773140 | 165 | H | -2.304088  | -3.792312 | 1.656327 |
| 113 | H | -18.413890 | 8.945367   | 0.973699  | 166 | C | -3.091777  | -5.681805 | 2.297720 |
| 114 | C | -18.904040 | 10.913889  | 0.238316  | 167 | H | -3.175517  | -6.105457 | 1.280839 |
| 115 | H | -19.981786 | 10.727977  | 0.164744  | 168 | H | -2.811145  | -6.523517 | 2.952243 |
| 116 | H | -18.723875 | 11.444518  | 1.182633  | 169 | C | -4.445695  | -5.131664 | 2.713531 |
| 117 | H | -18.629399 | 11.596545  | -0.576643 | 170 | H | -4.678309  | -4.250141 | 2.087174 |
| 118 | O | 6.075869   | -5.089474  | 0.589042  | 171 | H | -4.398463  | -4.766376 | 3.752841 |
| 119 | O | 1.505706   | -4.631871  | 1.011886  | 172 | C | -5.565710  | -6.147916 | 2.572012 |
| 120 | C | 7.406510   | -4.609226  | 0.428012  | 173 | H | -5.596245  | -6.501551 | 1.526461 |
| 121 | H | 7.505656   | -4.092699  | -0.540429 | 174 | H | -5.341875  | -7.037036 | 3.184994 |
| 122 | H | 7.640301   | -3.881032  | 1.221324  | 175 | C | -6.934145  | -5.606114 | 2.950902 |
| 123 | C | 8.328117   | -5.801334  | 0.503514  | 176 | H | -7.135065  | -4.682503 | 2.377613 |
| 124 | H | 8.045668   | -6.519797  | -0.279908 | 177 | H | -6.933291  | -5.307460 | 4.012272 |
| 125 | H | 8.171189   | -6.308894  | 1.466696  | 178 | C | -8.053096  | -6.603698 | 2.700559 |
| 126 | C | 9.790835   | -5.415048  | 0.352516  | 179 | H | -8.087425  | -6.839079 | 1.621459 |
| 127 | H | 9.942563   | -4.904058  | -0.611977 | 180 | H | -7.818229  | -7.554742 | 3.206592 |
| 128 | H | 10.062690  | -4.683227  | 1.130316  | 181 | C | -9.418599  | -6.114565 | 3.152175 |
| 129 | C | 10.716885  | -6.617994  | 0.442433  | 182 | H | -9.630526  | -5.144769 | 2.667380 |
| 130 | H | 10.439723  | -7.348600  | -0.335141 | 183 | H | -9.398116  | -5.909910 | 4.235243 |
| 131 | H | 10.554329  | -7.129398  | 1.405438  | 184 | C | -10.539372 | -7.092354 | 2.838285 |
| 132 | C | 12.189509  | -6.267137  | 0.302100  | 185 | H | -10.575097 | -7.264557 | 1.747574 |
| 133 | H | 12.356547  | -5.760091  | -0.662581 | 186 | H | -10.306994 | -8.074935 | 3.281120 |
| 134 | H | 12.468111  | -5.535796  | 1.078738  | 187 | C | -11.906233 | -6.631750 | 3.323275 |
| 135 | C | 13.099080  | -7.481797  | 0.401147  | 188 | H | -12.096211 | -5.609159 | 2.958459 |
| 136 | H | 12.817657  | -8.211611  | -0.376061 | 189 | H | -11.895057 | -6.560927 | 4.421531 |
| 137 | H | 12.924593  | -7.989256  | 1.364463  | 190 | C | -13.027270 | -7.549762 | 2.868734 |
| 138 | C | 14.577310  | -7.150937  | 0.268558  | 191 | H | -14.004455 | -7.224412 | 3.243845 |
| 139 | H | 14.755299  | -6.645661  | -0.695196 | 192 | H | -13.086729 | -7.580610 | 1.771944 |
| 140 | H | 14.861055  | -6.422546  | 1.046219  | 193 | H | -12.864185 | -8.578687 | 3.215690 |
| 141 | C | 15.473828  | -8.374956  | 0.371419  | 194 | C | -0.250821  | 4.655598  | 1.327235 |
| 142 | H | 15.188504  | -9.101942  | -0.407062 | 195 | H | -0.826672  | 5.151265  | 2.124701 |
| 143 | H | 15.290771  | -8.880860  | 1.333976  | 196 | H | -0.421331  | 5.215657  | 0.391004 |
| 144 | C | 16.955518  | -8.057351  | 0.244246  | 197 | C | 1.217554   | 4.612729  | 1.671884 |
| 145 | H | 17.140441  | -7.551217  | -0.717795 | 198 | H | 1.342918   | 4.161708  | 2.666998 |
| 146 | H | 17.243064  | -7.332917  | 1.024245  | 199 | H | 1.729319   | 3.945740  | 0.960757 |
| 147 | C | 17.842738  | -9.288004  | 0.346295  | 200 | C | 1.861541   | 5.989061  | 1.629134 |
| 148 | H | 17.555132  | -10.011671 | -0.434584 | 201 | H | 1.819918   | 6.373637  | 0.594439 |
| 149 | H | 17.655198  | -9.795678  | 1.307183  | 202 | H | 1.284479   | 6.700303  | 2.242591 |
| 150 | C | 19.327380  | -8.979649  | 0.222784  | 203 | C | 3.308487   | 5.959628  | 2.093616 |
| 151 | H | 19.614433  | -8.261486  | 1.006376  | 204 | H | 3.349066   | 5.662025  | 3.154153 |
| 152 | H | 19.512570  | -8.469641  | -0.735273 | 205 | H | 3.842890   | 5.168576  | 1.537076 |
| 153 | C | 20.193166  | -10.223852 | 0.320815  | 206 | C | 4.041156   | 7.276969  | 1.895683 |
| 154 | H | 19.944425  | -10.941165 | -0.472421 | 207 | H | 3.956169   | 7.576883  | 0.837191 |
| 155 | H | 21.260738  | -9.990917  | 0.233443  | 208 | H | 3.551009   | 8.075505  | 2.476408 |
| 156 | H | 20.043467  | -10.735311 | 1.280918  | 209 | C | 5.513502   | 7.185745  | 2.265138 |
| 157 | C | 0.346367   | -4.065484  | 1.625247  | 210 | H | 5.620817   | 7.004919  | 3.346936 |
| 158 | H | -0.089628  | -3.295083  | 0.979834  | 211 | H | 5.938742   | 6.295404  | 1.770080 |
| 159 | H | 0.623779   | -3.593359  | 2.580474  | 212 | C | 6.333092   | 8.400569  | 1.857016 |

|     |   |            |           |           |     |   |            |           |           |
|-----|---|------------|-----------|-----------|-----|---|------------|-----------|-----------|
| 213 | H | 6.016556   | 9.286636  | 2.430477  | 266 | C | 0.666805   | -5.694797 | -2.623943 |
| 214 | H | 6.122837   | 8.636513  | 0.800030  | 267 | C | -11.581475 | -2.880770 | 1.665516  |
| 215 | C | 7.827595   | 8.174582  | 2.021751  | 268 | H | -11.297015 | -1.839068 | 1.853365  |
| 216 | H | 8.067266   | 8.002005  | 3.084268  | 269 | H | -12.674256 | -2.942943 | 1.749129  |
| 217 | H | 8.095551   | 7.236111  | 1.504663  | 270 | H | -11.145489 | -3.499238 | 2.461002  |
| 218 | C | 8.695182   | 9.295335  | 1.472291  | 271 | C | -11.721916 | -2.420161 | -0.788376 |
| 219 | H | 8.493973   | 10.229405 | 2.021631  | 272 | H | -11.392683 | -1.384393 | -0.642514 |
| 220 | H | 8.408250   | 9.494308  | 0.425546  | 273 | H | -11.421958 | -2.733703 | -1.796563 |
| 221 | C | 10.180345  | 8.972992  | 1.533105  | 274 | H | -12.818590 | -2.434379 | -0.740369 |
| 222 | H | 10.369572  | 8.037716  | 0.976153  | 275 | C | -11.702427 | -4.760792 | 0.037601  |
| 223 | H | 10.469469  | 8.759332  | 2.576184  | 276 | H | -11.295106 | -5.493098 | 0.746701  |
| 224 | C | 11.073060  | 10.070882 | 0.975977  | 277 | H | -12.792113 | -4.746178 | 0.165667  |
| 225 | H | 10.905801  | 10.998652 | 1.544302  | 278 | H | -11.495446 | -5.114784 | -0.980314 |
| 226 | H | 10.769885  | 10.292557 | -0.058961 | 279 | C | 1.059442   | -6.835736 | -1.677951 |
| 227 | C | 12.544930  | 9.697282  | 1.013905  | 280 | H | 0.273894   | -7.598113 | -1.605102 |
| 228 | H | 12.734647  | 8.785331  | 0.431618  | 281 | H | 1.968581   | -7.326815 | -2.048979 |
| 229 | H | 13.182646  | 10.489499 | 0.605182  | 282 | H | 1.262025   | -6.451506 | -0.670106 |
| 230 | H | 12.876705  | 9.501773  | 2.042176  | 283 | C | 1.834552   | -4.717557 | -2.724518 |
| 231 | C | 5.295338   | 8.547920  | -2.036388 | 284 | H | 1.614056   | -3.884589 | -3.404461 |
| 232 | C | -6.221251  | -8.996385 | -1.922846 | 285 | H | 2.110283   | -4.302202 | -1.746490 |
| 233 | F | 6.514151   | 9.046880  | -1.792345 | 286 | H | 2.714058   | -5.242831 | -3.116227 |
| 234 | F | 5.024309   | 8.780732  | -3.330426 | 287 | C | 0.386726   | -6.260072 | -4.021007 |
| 235 | F | 4.421346   | 9.292652  | -1.334051 | 288 | H | 1.295980   | -6.732093 | -4.414842 |
| 236 | F | -7.509950  | -9.309159 | -1.749180 | 289 | H | -0.402522  | -7.020922 | -4.011222 |
| 237 | F | -5.913678  | -9.287245 | -3.198599 | 290 | H | 0.088129   | -5.466748 | -4.718152 |
| 238 | F | -5.503650  | -9.844387 | -1.166837 |     |   |            |           |           |
| 239 | C | 10.559969  | 4.041622  | 1.371163  |     |   |            |           |           |
| 240 | C | 11.391207  | 2.859785  | 1.862360  |     |   |            |           |           |
| 241 | H | 10.943098  | 2.375946  | 2.739120  |     |   |            |           |           |
| 242 | H | 11.526271  | 2.102543  | 1.079295  |     |   |            |           |           |
| 243 | H | 12.386272  | 3.213864  | 2.157977  |     |   |            |           |           |
| 244 | C | 10.400224  | 5.042567  | 2.522217  |     |   |            |           |           |
| 245 | H | 11.386671  | 5.394815  | 2.852142  |     |   |            |           |           |
| 246 | H | 9.812295   | 5.919259  | 2.222278  |     |   |            |           |           |
| 247 | H | 9.898586   | 4.578718  | 3.381186  |     |   |            |           |           |
| 248 | C | 11.305267  | 4.708777  | 0.210336  |     |   |            |           |           |
| 249 | H | 11.416564  | 4.021384  | -0.637852 |     |   |            |           |           |
| 250 | H | 10.799186  | 5.612459  | -0.149443 |     |   |            |           |           |
| 251 | H | 12.309359  | 5.005474  | 0.539819  |     |   |            |           |           |
| 252 | C | -1.008077  | 4.271984  | -3.031900 |     |   |            |           |           |
| 253 | C | -2.099958  | 3.208762  | -2.943094 |     |   |            |           |           |
| 254 | H | -2.351488  | 2.964310  | -1.901463 |     |   |            |           |           |
| 255 | H | -3.010896  | 3.584490  | -3.424916 |     |   |            |           |           |
| 256 | H | -1.814291  | 2.282064  | -3.456546 |     |   |            |           |           |
| 257 | C | -0.700001  | 4.534515  | -4.512003 |     |   |            |           |           |
| 258 | H | 0.038671   | 5.334685  | -4.643061 |     |   |            |           |           |
| 259 | H | -0.312780  | 3.630988  | -5.000264 |     |   |            |           |           |
| 260 | H | -1.617532  | 4.835675  | -5.034011 |     |   |            |           |           |
| 261 | C | -1.533948  | 5.557488  | -2.385695 |     |   |            |           |           |
| 262 | H | -2.417146  | 5.908280  | -2.934801 |     |   |            |           |           |
| 263 | H | -1.839210  | 5.377819  | -1.346165 |     |   |            |           |           |
| 264 | H | -0.795666  | 6.368196  | -2.393910 |     |   |            |           |           |
| 265 | C | -11.144034 | -3.360711 | 0.277372  |     |   |            |           |           |

**Table S6.** Cartesian coordinates of the optimized ground-state geometry of the closed form of **3** in dichloromethane

| Energy = -5944.50391589 Hartrees |    |           |           |           |     |   |           |           |           |
|----------------------------------|----|-----------|-----------|-----------|-----|---|-----------|-----------|-----------|
| 1                                | Pt | -2.588530 | -2.552894 | 1.164861  | 54  | C | -0.204323 | -5.971161 | -1.415358 |
| 2                                | C  | -1.998857 | -4.379903 | 1.516334  | 55  | C | -1.743026 | -4.203051 | -2.137492 |
| 3                                | C  | -2.873361 | -5.431646 | 1.227446  | 56  | C | -1.191662 | -6.925128 | -1.647669 |
| 4                                | C  | -0.702904 | -4.587075 | 1.995404  | 57  | C | -2.735465 | -5.157353 | -2.364005 |
| 5                                | C  | -2.433385 | -6.738427 | 1.417410  | 58  | C | -2.440993 | -6.503169 | -2.120459 |
| 6                                | C  | -0.259351 | -5.896703 | 2.182974  | 59  | H | -1.025150 | -7.984499 | -1.453518 |
| 7                                | C  | -1.133023 | -6.950152 | 1.892955  | 60  | H | -3.728180 | -4.877899 | -2.715234 |
| 8                                | H  | -3.062637 | -7.596984 | 1.182470  | 61  | N | 1.863873  | -5.008108 | -0.721981 |
| 9                                | H  | 0.748637  | -6.115647 | 2.533558  | 62  | C | 1.144445  | -6.165622 | -0.870384 |
| 10                               | N  | -0.670439 | -2.202647 | 1.848450  | 63  | C | 3.103641  | -5.076168 | -0.214677 |
| 11                               | C  | 0.036905  | -3.331889 | 2.189375  | 64  | C | 1.693883  | -7.389944 | -0.500401 |
| 12                               | C  | -0.077725 | -1.009471 | 1.957001  | 65  | C | 3.686627  | -6.269638 | 0.164292  |
| 13                               | C  | 1.334054  | -3.224127 | 2.666373  | 66  | H | 3.625361  | -4.126462 | -0.116284 |
| 14                               | C  | 1.219022  | -0.859369 | 2.424336  | 67  | C | 2.983969  | -7.473703 | 0.022923  |
| 15                               | H  | -0.675534 | -0.152285 | 1.652169  | 68  | H | 1.084800  | -8.280932 | -0.625603 |
| 16                               | C  | 1.960790  | -1.979116 | 2.800588  | 69  | H | 4.697602  | -6.249015 | 0.563437  |
| 17                               | H  | 1.863042  | -4.138308 | 2.931027  | 70  | N | -0.679630 | -2.071040 | -1.931824 |
| 18                               | H  | 1.631906  | 0.143915  | 2.469856  | 71  | C | -1.823979 | -2.743971 | -2.293129 |
| 19                               | N  | -4.268910 | -3.609809 | 0.577868  | 72  | C | -0.658307 | -0.737394 | -2.021851 |
| 20                               | C  | -5.401810 | -3.091388 | 0.080538  | 73  | C | -2.923962 | -2.046817 | -2.766798 |
| 21                               | C  | -4.157077 | -4.971565 | 0.686761  | 74  | C | -1.739915 | -0.001703 | -2.483355 |
| 22                               | C  | -6.460673 | -3.877301 | -0.331601 | 75  | H | 0.265959  | -0.254201 | -1.709532 |
| 23                               | H  | -5.435712 | -2.005623 | 0.019968  | 76  | C | -2.910658 | -0.650961 | -2.876128 |
| 24                               | C  | -5.200546 | -5.800323 | 0.286310  | 77  | H | -3.808240 | -2.614402 | -3.052179 |
| 25                               | C  | -6.382293 | -5.273202 | -0.233086 | 78  | H | -1.646275 | 1.079711  | -2.513332 |
| 26                               | H  | -7.348538 | -3.386644 | -0.722949 | 79  | O | 7.731414  | 0.513726  | -0.079516 |
| 27                               | H  | -5.065202 | -6.873847 | 0.385174  | 80  | O | 4.195420  | 3.642278  | 0.193267  |
| 28                               | C  | -3.186123 | -0.601922 | 0.811355  | 81  | C | 8.218707  | -0.816859 | -0.214384 |
| 29                               | C  | -3.479028 | 0.578468  | 0.606161  | 82  | H | 7.766011  | -1.459227 | 0.559466  |
| 30                               | C  | -3.801539 | 1.942113  | 0.357286  | 83  | H | 7.931504  | -1.224751 | -1.196976 |
| 31                               | C  | -5.146492 | 2.342611  | 0.297164  | 84  | C | 9.719814  | -0.772492 | -0.069644 |
| 32                               | C  | -2.773001 | 2.893205  | 0.158612  | 85  | H | 9.970844  | -0.310447 | 0.896430  |
| 33                               | C  | -5.463830 | 3.673550  | 0.040249  | 86  | H | 10.133792 | -0.116754 | -0.849684 |
| 34                               | H  | -5.917291 | 1.593984  | 0.451593  | 87  | C | 10.345119 | -2.155437 | -0.163465 |
| 35                               | C  | -3.125813 | 4.249371  | -0.069942 | 88  | H | 9.935554  | -2.799871 | 0.631257  |
| 36                               | C  | -4.455493 | 4.631732  | -0.143644 | 89  | H | 10.057215 | -2.628731 | -1.116089 |
| 37                               | H  | -4.750330 | 5.658538  | -0.337304 | 90  | C | 11.861609 | -2.119120 | -0.055296 |
| 38                               | C  | -1.408066 | 2.528304  | 0.148052  | 91  | H | 12.147895 | -1.619234 | 0.884589  |
| 39                               | C  | -0.214324 | 2.271299  | 0.082161  | 92  | H | 12.268867 | -1.491844 | -0.865112 |
| 40                               | C  | 1.112324  | 1.979967  | -0.009380 | 93  | C | 12.505664 | -3.495395 | -0.109504 |
| 41                               | C  | 2.302298  | 1.712892  | -0.097974 | 94  | H | 12.111320 | -4.116721 | 0.711662  |
| 42                               | C  | 3.674713  | 1.384626  | -0.161586 | 95  | H | 12.207653 | -4.004015 | -1.041243 |
| 43                               | C  | 4.093934  | 0.051239  | -0.395181 | 96  | C | 14.023204 | -3.447153 | -0.023473 |
| 44                               | C  | 4.659253  | 2.387669  | 0.036462  | 97  | H | 14.319627 | -2.920636 | 0.898939  |
| 45                               | C  | 5.460258  | -0.271009 | -0.374138 | 98  | H | 14.416004 | -2.838553 | -0.854855 |
| 46                               | C  | 6.005365  | 2.056759  | 0.056995  | 99  | C | 14.677472 | -4.819655 | -0.050779 |
| 47                               | C  | 6.401675  | 0.725601  | -0.136451 | 100 | H | 14.294716 | -5.424215 | 0.788280  |
| 48                               | H  | 5.752878  | -1.301529 | -0.550605 | 101 | H | 14.374234 | -5.352334 | -0.967393 |
| 49                               | H  | 6.779173  | 2.798737  | 0.225349  | 102 | C | 16.195446 | -4.761141 | 0.019989  |
| 50                               | C  | 3.135898  | -0.970082 | -0.648846 | 103 | H | 16.497585 | -4.217316 | 0.930470  |
| 51                               | C  | 2.300274  | -1.849607 | -0.871472 | 104 | H | 16.577042 | -4.164710 | -0.825372 |
| 52                               | Pt | 0.859226  | -3.282903 | -1.266032 | 105 | C | 16.856856 | -6.130498 | 0.009397  |
| 53                               | C  | -0.499618 | -4.626677 | -1.662437 | 106 | H | 16.482472 | -6.724116 | 0.859991  |

|     |   |            |           |           |     |   |           |           |           |
|-----|---|------------|-----------|-----------|-----|---|-----------|-----------|-----------|
| 107 | H | 16.549953  | -6.678447 | -0.896997 | 160 | C | -1.000180 | 7.180990  | -0.075544 |
| 108 | C | 18.374875  | -6.064895 | 0.069023  | 161 | H | -0.644058 | 6.925878  | 0.933574  |
| 109 | H | 18.749318  | -5.476620 | -0.785367 | 162 | H | -0.259232 | 6.774654  | -0.778878 |
| 110 | H | 18.682171  | -5.510384 | 0.971457  | 163 | C | -1.092515 | 8.690778  | -0.226457 |
| 111 | C | 19.041626  | -7.432473 | 0.068451  | 164 | H | -1.276299 | 8.949102  | -1.281481 |
| 112 | H | 18.670864  | -8.015757 | 0.925559  | 165 | H | -1.962172 | 9.070769  | 0.334240  |
| 113 | H | 18.729626  | -7.986663 | -0.830352 | 166 | C | 0.162242  | 9.393190  | 0.268429  |
| 114 | C | 20.557167  | -7.344581 | 0.120480  | 167 | H | 0.267133  | 9.213866  | 1.351128  |
| 115 | H | 21.027878  | -8.334451 | 0.122823  | 168 | H | 1.049979  | 8.933921  | -0.197069 |
| 116 | H | 20.950447  | -6.792741 | -0.743500 | 169 | C | 0.168450  | 10.889302 | 0.000555  |
| 117 | H | 20.891163  | -6.816672 | 1.023517  | 170 | H | -0.790837 | 11.325863 | 0.324778  |
| 118 | O | -6.723108  | 4.147044  | -0.045686 | 171 | H | 0.226906  | 11.067533 | -1.085808 |
| 119 | O | -2.088357  | 5.092929  | -0.199776 | 172 | C | 1.306887  | 11.613551 | 0.701766  |
| 120 | C | -7.804481  | 3.240273  | 0.137252  | 173 | H | 1.166910  | 11.532580 | 1.792450  |
| 121 | H | -7.763084  | 2.449997  | -0.631014 | 174 | H | 2.260052  | 11.101014 | 0.485075  |
| 122 | H | -7.721950  | 2.752671  | 1.121957  | 175 | C | 1.420597  | 13.078875 | 0.312389  |
| 123 | C | -9.091625  | 4.021457  | 0.041275  | 176 | H | 0.431301  | 13.558714 | 0.400214  |
| 124 | H | -9.142231  | 4.519566  | -0.937968 | 177 | H | 1.694959  | 13.152564 | -0.753865 |
| 125 | H | -9.081232  | 4.817084  | 0.800725  | 178 | C | 2.426744  | 13.850057 | 1.151663  |
| 126 | C | -10.305224 | 3.127182  | 0.241209  | 179 | H | 2.118752  | 13.816103 | 2.209892  |
| 127 | H | -10.320758 | 2.345713  | -0.535688 | 180 | H | 3.405726  | 13.341861 | 1.107465  |
| 128 | H | -10.213747 | 2.596184  | 1.202665  | 181 | C | 2.589045  | 15.298546 | 0.718717  |
| 129 | C | -11.618263 | 3.893864  | 0.216461  | 182 | H | 1.602574  | 15.791909 | 0.718900  |
| 130 | H | -11.716438 | 4.425000  | -0.744410 | 183 | H | 2.939722  | 15.329838 | -0.327544 |
| 131 | H | -11.596199 | 4.676467  | 0.992453  | 184 | C | 3.548150  | 16.089515 | 1.593991  |
| 132 | C | -12.832151 | 3.004064  | 0.432565  | 185 | H | 3.205601  | 16.053396 | 2.641651  |
| 133 | H | -12.865010 | 2.231108  | -0.353060 | 186 | H | 4.538157  | 15.599952 | 1.586913  |
| 134 | H | -12.718219 | 2.459518  | 1.384587  | 187 | C | 3.702463  | 17.540671 | 1.164082  |
| 135 | C | -14.146848 | 3.768278  | 0.446252  | 188 | H | 2.716508  | 18.030320 | 1.181589  |
| 136 | H | -14.267189 | 4.309407  | -0.506851 | 189 | H | 4.036489  | 17.571895 | 0.113723  |
| 137 | H | -14.108977 | 4.544044  | 1.228939  | 190 | C | 4.678784  | 18.310518 | 2.036591  |
| 138 | C | -15.357051 | 2.877273  | 0.679252  | 191 | H | 4.781361  | 19.354732 | 1.718153  |
| 139 | H | -15.401711 | 2.106667  | -0.108226 | 192 | H | 4.353122  | 18.315144 | 3.085406  |
| 140 | H | -15.228137 | 2.329362  | 1.627506  | 193 | H | 5.678287  | 17.854633 | 2.010585  |
| 141 | C | -16.672358 | 3.639847  | 0.714920  | 194 | C | 5.140016  | 4.708677  | 0.196939  |
| 142 | H | -16.806155 | 4.184676  | -0.234341 | 195 | H | 5.798657  | 4.613244  | -0.681545 |
| 143 | H | -16.624626 | 4.412753  | 1.499966  | 196 | H | 5.773197  | 4.645484  | 1.096627  |
| 144 | C | -17.879023 | 2.747183  | 0.960058  | 197 | C | 4.399014  | 6.024023  | 0.149918  |
| 145 | H | -17.930669 | 1.977194  | 0.172352  | 198 | H | 3.686701  | 6.001452  | -0.687711 |
| 146 | H | -17.739948 | 2.198496  | 1.906453  | 199 | H | 3.807308  | 6.153424  | 1.067660  |
| 147 | C | -19.194840 | 3.507865  | 1.008978  | 200 | C | 5.378330  | 7.175775  | -0.027078 |
| 148 | H | -19.338291 | 4.054880  | 0.062215  | 201 | H | 6.118901  | 7.159638  | 0.789118  |
| 149 | H | -19.142649 | 4.279424  | 1.795256  | 202 | H | 5.952009  | 7.014473  | -0.954460 |
| 150 | C | -20.399717 | 2.613713  | 1.261641  | 203 | C | 4.729672  | 8.550958  | -0.085008 |
| 151 | H | -20.251262 | 2.066080  | 2.205250  | 204 | H | 3.937388  | 8.553231  | -0.851775 |
| 152 | H | -20.452822 | 1.846630  | 0.473531  | 205 | H | 4.227586  | 8.768396  | 0.872326  |
| 153 | C | -21.704648 | 3.388873  | 1.315742  | 206 | C | 5.741085  | 9.642156  | -0.403813 |
| 154 | H | -21.889133 | 3.918506  | 0.371758  | 207 | H | 6.569952  | 9.595286  | 0.321735  |
| 155 | H | -22.564589 | 2.735166  | 1.502004  | 208 | H | 6.193965  | 9.430516  | -1.386785 |
| 156 | H | -21.683211 | 4.143355  | 2.113237  | 209 | C | 5.168863  | 11.051059 | -0.413756 |
| 157 | C | -2.325004  | 6.492801  | -0.296702 | 210 | H | 4.281353  | 11.088084 | -1.069110 |
| 158 | H | -3.051944  | 6.805073  | 0.469231  | 211 | H | 4.808506  | 11.310940 | 0.596644  |
| 159 | H | -2.751989  | 6.733732  | -1.283948 | 212 | C | 6.178660  | 12.089795 | -0.879067 |

|     |   |           |           |           |     |   |           |            |           |
|-----|---|-----------|-----------|-----------|-----|---|-----------|------------|-----------|
| 213 | H | 6.483886  | 11.857105 | -1.912749 | 266 | C | -3.936448 | 1.598943   | -3.413692 |
| 214 | H | 7.094991  | 12.006968 | -0.271350 | 267 | C | -3.100162 | 1.903136   | -4.055917 |
| 215 | C | 5.662260  | 13.517843 | -0.815583 | 268 | H | -4.842290 | 2.080551   | -3.802482 |
| 216 | H | 4.709882  | 13.590677 | -1.369720 | 269 | H | -3.759012 | 1.992842   | -2.403877 |
| 217 | H | 5.418844  | 13.771929 | 0.230477  | 270 | H | -5.349026 | -0.250669  | -2.541328 |
| 218 | C | 6.644404  | 14.541720 | -1.363206 | 271 | C | -5.607865 | -1.316002  | -2.591329 |
| 219 | H | 6.876565  | 14.301657 | -2.414049 | 272 | H | -5.158997 | 0.007945   | -1.491048 |
| 220 | H | 7.599471  | 14.459239 | -0.818115 | 273 | H | -6.221201 | 0.320925   | -2.886049 |
| 221 | C | 6.132065  | 15.969979 | -1.270793 | 274 | H | -4.392189 | -0.373865  | -4.851635 |
| 222 | H | 5.899227  | 16.206543 | -0.217726 | 275 | C | -3.538152 | -0.143913  | -5.501622 |
| 223 | H | 5.173441  | 16.050417 | -1.812474 | 276 | H | -4.584460 | -1.451974  | -4.912088 |
| 224 | C | 7.103607  | 17.006276 | -1.814615 | 277 | H | -5.272158 | 0.145456   | -5.253183 |
| 225 | H | 7.332884  | 16.771521 | -2.865568 | 278 | H | 3.633907  | -8.788712  | 0.429194  |
| 226 | H | 8.058559  | 16.926375 | -1.272506 | 279 | C | 4.903803  | -8.990265  | -0.406235 |
| 227 | C | 6.567017  | 18.423328 | -1.707167 | 280 | H | 5.633784  | -8.187213  | -0.248142 |
| 228 | H | 6.365710  | 18.691229 | -0.660785 | 281 | H | 5.383842  | -9.937174  | -0.127660 |
| 229 | H | 7.271574  | 19.161854 | -2.107108 | 282 | H | 4.671016  | -9.031207  | -1.477922 |
| 230 | H | 5.624034  | 18.532062 | -2.259847 | 283 | C | 4.008247  | -8.727635  | 1.915087  |
| 231 | C | -0.696118 | -8.368500 | 2.046381  | 284 | H | 4.467194  | -9.676998  | 2.219642  |
| 232 | C | -3.467548 | -7.562480 | -2.345544 | 285 | H | 4.728559  | -7.928928  | 2.128101  |
| 233 | F | -4.663635 | -7.066279 | -2.688868 | 286 | H | 3.123033  | -8.564051  | 2.541703  |
| 234 | F | -3.105316 | -8.420073 | -3.312840 | 287 | C | 2.711753  | -9.984003  | 0.206469  |
| 235 | F | -3.661257 | -8.314662 | -1.242673 | 288 | H | 1.790724  | -9.908631  | 0.797089  |
| 236 | F | -1.437886 | -9.034835 | 2.944764  | 289 | H | 2.438728  | -10.098506 | -0.850463 |
| 237 | F | 0.582411  | -8.482091 | 2.429466  | 290 | H | 3.228451  | -10.901315 | 0.513812  |
| 238 | F | -0.816512 | -9.055967 | 0.891335  |     |   |           |            |           |
| 239 | C | 3.382998  | -1.892606 | 3.338117  |     |   |           |            |           |
| 240 | C | 3.899339  | -0.456252 | 3.372021  |     |   |           |            |           |
| 241 | H | 3.292364  | 0.181871  | 4.026865  |     |   |           |            |           |
| 242 | H | 4.924296  | -0.449441 | 3.763210  |     |   |           |            |           |
| 243 | H | 3.923300  | -0.002095 | 2.372022  |     |   |           |            |           |
| 244 | C | 3.404927  | -2.451024 | 4.766155  |     |   |           |            |           |
| 245 | H | 2.745689  | -1.873010 | 5.426530  |     |   |           |            |           |
| 246 | H | 3.087986  | -3.500301 | 4.804122  |     |   |           |            |           |
| 247 | H | 4.423681  | -2.395305 | 5.171555  |     |   |           |            |           |
| 248 | C | 4.314671  | -2.724687 | 2.448263  |     |   |           |            |           |
| 249 | H | 4.060218  | -3.792230 | 2.470134  |     |   |           |            |           |
| 250 | H | 4.265227  | -2.380781 | 1.406085  |     |   |           |            |           |
| 251 | H | 5.350797  | -2.621986 | 2.798004  |     |   |           |            |           |
| 252 | C | -7.556158 | -6.137148 | -0.670279 |     |   |           |            |           |
| 253 | C | -8.768477 | -5.789073 | 0.201699  |     |   |           |            |           |
| 254 | H | -9.056800 | -4.735552 | 0.105844  |     |   |           |            |           |
| 255 | H | -9.629433 | -6.400740 | -0.097608 |     |   |           |            |           |
| 256 | H | -8.562268 | -5.989391 | 1.260938  |     |   |           |            |           |
| 257 | C | -7.265857 | -7.628348 | -0.525138 |     |   |           |            |           |
| 258 | H | -6.417515 | -7.943257 | -1.145187 |     |   |           |            |           |
| 259 | H | -7.058810 | -7.906383 | 0.516234  |     |   |           |            |           |
| 260 | H | -8.143643 | -8.200805 | -0.848494 |     |   |           |            |           |
| 261 | C | -7.879972 | -5.843366 | -2.139635 |     |   |           |            |           |
| 262 | H | -8.724507 | -6.464916 | -2.463582 |     |   |           |            |           |
| 263 | H | -8.158653 | -4.795534 | -2.301915 |     |   |           |            |           |
| 264 | H | -7.023915 | -6.072658 | -2.786163 |     |   |           |            |           |
| 265 | C | -4.131575 | 0.084825  | -3.411757 |     |   |           |            |           |

**Table S7.** Cartesian coordinates of the optimized T<sub>1</sub> geometry of the open form of **1** in dichloromethane

| Energy = -4641.95790161 Hartrees |    |           |           |           |     |    |            |           |           |
|----------------------------------|----|-----------|-----------|-----------|-----|----|------------|-----------|-----------|
| 1                                | Pt | 3.671448  | 3.390323  | -0.874539 | 54  | C  | -4.024170  | -2.138761 | -0.588695 |
| 2                                | C  | 3.427858  | 5.288124  | -1.273955 | 55  | Pt | -3.665803  | -4.107758 | -1.113475 |
| 3                                | C  | 4.469987  | 6.172881  | -0.989146 | 56  | C  | -3.224394  | -5.956099 | -1.569441 |
| 4                                | C  | 2.208970  | 5.713482  | -1.807116 | 57  | C  | -4.125409  | -6.965853 | -1.226783 |
| 5                                | C  | 4.286676  | 7.534513  | -1.248984 | 58  | C  | -1.985790  | -6.225543 | -2.156203 |
| 6                                | C  | 2.029227  | 7.076264  | -2.064772 | 59  | C  | -3.773613  | -8.295719 | -1.476859 |
| 7                                | C  | 3.070316  | 7.967798  | -1.786140 | 60  | C  | -1.636787  | -7.557248 | -2.402190 |
| 8                                | H  | 5.070689  | 8.262438  | -1.037721 | 61  | C  | -2.534291  | -8.573501 | -2.060356 |
| 9                                | H  | 1.094320  | 7.456715  | -2.475544 | 62  | H  | -4.442619  | -9.115819 | -1.216987 |
| 10                               | H  | 2.928178  | 9.027342  | -1.986668 | 63  | H  | -0.678338  | -7.819020 | -2.849553 |
| 11                               | N  | 1.746825  | 3.372891  | -1.643476 | 64  | H  | -2.258566  | -9.607980 | -2.250530 |
| 12                               | C  | 1.259823  | 4.612589  | -1.992030 | 65  | N  | -5.356591  | -5.085353 | -0.411015 |
| 13                               | C  | 0.962305  | 2.292849  | -1.761569 | 66  | C  | -5.341941  | -6.447687 | -0.597968 |
| 14                               | C  | -0.047568 | 4.739961  | -2.450412 | 67  | C  | -6.419706  | -4.506091 | 0.166207  |
| 15                               | C  | -0.342365 | 2.370128  | -2.224050 | 68  | C  | -6.428779  | -7.218104 | -0.195631 |
| 16                               | H  | 1.409463  | 1.347175  | -1.460600 | 69  | C  | -7.525790  | -5.231237 | 0.581175  |
| 17                               | C  | -0.855711 | 3.615682  | -2.567203 | 70  | H  | -6.361348  | -3.427341 | 0.286631  |
| 18                               | H  | -0.424282 | 5.726854  | -2.708660 | 71  | C  | -7.528407  | -6.610103 | 0.393749  |
| 19                               | H  | -0.938612 | 1.464005  | -2.292792 | 72  | H  | -6.401020  | -8.293988 | -0.353114 |
| 20                               | H  | -1.880683 | 3.712978  | -2.917236 | 73  | H  | -8.363256  | -4.717123 | 1.042141  |
| 21                               | N  | 5.491484  | 4.146926  | -0.234087 | 74  | H  | -8.381197  | -7.209405 | 0.705381  |
| 22                               | C  | 6.488191  | 3.437293  | 0.314577  | 75  | N  | -1.816118  | -3.844759 | -2.015918 |
| 23                               | C  | 5.631257  | 5.505460  | -0.396466 | 76  | C  | -1.203636  | -5.011802 | -2.409653 |
| 24                               | C  | 7.673202  | 4.022123  | 0.730638  | 77  | C  | -1.200467  | -2.670594 | -2.214290 |
| 25                               | H  | 6.307688  | 2.369829  | 0.412726  | 78  | C  | 0.062364   | -4.970827 | -2.984500 |
| 26                               | C  | 6.804625  | 6.136181  | 0.004599  | 79  | C  | 0.054263   | -2.579873 | -2.797272 |
| 27                               | C  | 7.831533  | 5.394391  | 0.571241  | 80  | H  | -1.742526  | -1.790162 | -1.874398 |
| 28                               | H  | 8.450329  | 3.405245  | 1.170500  | 81  | C  | 0.697941   | -3.751722 | -3.178414 |
| 29                               | H  | 6.902384  | 7.210048  | -0.134644 | 82  | H  | 0.544686   | -5.901105 | -3.273359 |
| 30                               | H  | 8.748678  | 5.884813  | 0.886884  | 83  | H  | 0.514117   | -1.604274 | -2.929536 |
| 31                               | C  | 3.928504  | 1.370724  | -0.492041 | 84  | H  | 1.691050   | -3.717691 | -3.619370 |
| 32                               | C  | 4.063709  | 0.151266  | -0.334434 | 85  | O  | -6.227089  | 3.424500  | 0.205994  |
| 33                               | C  | 4.172438  | -1.256449 | -0.227528 | 86  | O  | -1.549004  | 2.992943  | 0.769810  |
| 34                               | C  | 5.427441  | -1.872357 | -0.281278 | 87  | C  | -7.520452  | 2.875004  | -0.020346 |
| 35                               | C  | 2.963821  | -2.055646 | -0.130012 | 88  | H  | -7.552122  | 2.393881  | -1.011438 |
| 36                               | C  | 5.527174  | -3.261029 | -0.279588 | 89  | H  | -7.732683  | 2.099623  | 0.733284  |
| 37                               | H  | 6.308230  | -1.241554 | -0.353916 | 90  | C  | -8.526418  | 3.995953  | 0.067240  |
| 38                               | C  | 3.113607  | -3.491222 | -0.151205 | 91  | H  | -8.268426  | 4.769912  | -0.670415 |
| 39                               | C  | 4.366310  | -4.055946 | -0.222296 | 92  | H  | -8.452065  | 4.466615  | 1.058544  |
| 40                               | H  | 4.460435  | -5.138828 | -0.217649 | 93  | C  | -9.943704  | 3.498609  | -0.170476 |
| 41                               | C  | 1.748419  | -1.425038 | -0.052585 | 94  | H  | -10.006564 | 3.026133  | -1.164113 |
| 42                               | C  | 0.655664  | -0.814079 | 0.077618  | 95  | H  | -10.182270 | 2.705692  | 0.556801  |
| 43                               | C  | -0.500036 | -0.208766 | 0.190394  | 96  | C  | -10.983592 | 4.603262  | -0.069577 |
| 44                               | C  | -1.613838 | 0.384600  | 0.250052  | 97  | H  | -10.742973 | 5.399577  | -0.792859 |
| 45                               | C  | -2.785706 | 1.074451  | 0.253856  | 98  | H  | -10.922257 | 5.072494  | 0.926004  |
| 46                               | C  | -4.069605 | 0.443074  | -0.005832 | 99  | C  | -12.402112 | 4.111995  | -0.310750 |
| 47                               | C  | -2.768611 | 2.503210  | 0.501503  | 100 | H  | -12.464045 | 3.649126  | -1.309557 |
| 48                               | C  | -5.234571 | 1.224113  | -0.013031 | 101 | H  | -12.637429 | 3.308753  | 0.407010  |
| 49                               | C  | -3.923034 | 3.238254  | 0.457148  | 102 | C  | -13.447087 | 5.210638  | -0.197422 |
| 50                               | C  | -5.165105 | 2.594575  | 0.206361  | 103 | H  | -13.209827 | 6.016393  | -0.911778 |
| 51                               | H  | -6.181625 | 0.732890  | -0.215058 | 104 | H  | -13.386874 | 5.670130  | 0.803109  |
| 52                               | H  | -3.931893 | 4.310238  | 0.630477  | 105 | C  | -14.865612 | 4.720814  | -0.442672 |
| 53                               | C  | -4.099820 | -0.937050 | -0.299028 | 106 | H  | -14.927920 | 4.268054  | -1.446162 |

|     |   |            |           |           |     |   |            |            |           |
|-----|---|------------|-----------|-----------|-----|---|------------|------------|-----------|
| 107 | H | -15.100122 | 3.909909  | 0.266808  | 160 | H | 21.617317  | -6.503875  | -0.050747 |
| 108 | C | -15.911320 | 5.817564  | -0.317684 | 161 | H | 22.573500  | -5.256096  | 0.763475  |
| 109 | H | -15.673802 | 6.631167  | -1.023078 | 162 | H | 21.479439  | -6.286503  | 1.698667  |
| 110 | H | -15.851225 | 6.266302  | 0.687772  | 163 | C | 0.888243   | -4.117177  | 0.598703  |
| 111 | C | -17.330236 | 5.331695  | -0.568557 | 164 | H | 0.198998   | -3.487742  | 0.018647  |
| 112 | H | -17.392896 | 4.890474  | -1.577184 | 165 | H | 1.133558   | -3.581943  | 1.528451  |
| 113 | H | -17.565816 | 4.513030  | 0.131649  | 166 | C | 0.230940   | -5.442352  | 0.897732  |
| 114 | C | -18.374364 | 6.428345  | -0.431315 | 167 | H | 0.065173   | -5.979431  | -0.050629 |
| 115 | H | -18.315806 | 6.864625  | 0.579838  | 168 | H | 0.902321   | -6.067245  | 1.504783  |
| 116 | H | -18.134923 | 7.250930  | -1.125777 | 169 | C | -1.095856  | -5.223852  | 1.607748  |
| 117 | C | -19.794766 | 5.949304  | -0.690684 | 170 | H | -0.919429  | -4.725575  | 2.574993  |
| 118 | H | -19.853210 | 5.522781  | -1.704033 | 171 | H | -1.711800  | -4.523550  | 1.013373  |
| 119 | H | -20.028954 | 5.122551  | -0.002278 | 172 | C | -1.893569  | -6.497966  | 1.829010  |
| 120 | C | -20.822824 | 7.056747  | -0.536246 | 173 | H | -2.071730  | -6.987031  | 0.855183  |
| 121 | H | -21.841728 | 6.703808  | -0.733283 | 174 | H | -1.306239  | -7.212363  | 2.429281  |
| 122 | H | -20.806660 | 7.471184  | 0.480423  | 175 | C | -3.227630  | -6.226356  | 2.505363  |
| 123 | H | -20.619080 | 7.884204  | -1.228786 | 176 | H | -3.775532  | -5.469268  | 1.915705  |
| 124 | O | 6.686821   | -3.945001 | -0.325000 | 177 | H | -3.051940  | -5.767706  | 3.492798  |
| 125 | O | 2.079894   | -4.361572 | -0.153930 | 178 | C | -4.104384  | -7.457118  | 2.667543  |
| 126 | C | 7.909657   | -3.215910 | -0.334121 | 179 | H | -4.291874  | -7.901468  | 1.673555  |
| 127 | H | 7.974242   | -2.606305 | -1.250266 | 180 | H | -3.566993  | -8.226959  | 3.245848  |
| 128 | H | 7.940932   | -2.528857 | 0.526699  | 181 | C | -5.431929  | -7.144239  | 3.339253  |
| 129 | C | 9.042038   | -4.210332 | -0.263381 | 182 | H | -5.926212  | -6.323103  | 2.791053  |
| 130 | H | 8.967917   | -4.903117 | -1.114357 | 183 | H | -5.246576  | -6.757202  | 4.354843  |
| 131 | H | 8.924439   | -4.815538 | 0.647501  | 184 | C | -6.380856  | -8.328977  | 3.412337  |
| 132 | C | 10.399522  | -3.524788 | -0.260703 | 185 | H | -6.591755  | -8.686146  | 2.389140  |
| 133 | H | 10.522244  | -2.942933 | -1.188444 | 186 | H | -5.888422  | -9.170013  | 3.927777  |
| 134 | H | 10.440322  | -2.793560 | 0.562989  | 187 | C | -7.691163  | -8.001669  | 4.111289  |
| 135 | C | 11.553128  | -4.505639 | -0.118974 | 188 | H | -8.148452  | -7.117377  | 3.634562  |
| 136 | H | 11.511342  | -5.241723 | -0.938462 | 189 | H | -7.485425  | -7.703409  | 5.152406  |
| 137 | H | 11.424730  | -5.083551 | 0.810957  | 190 | C | -8.687535  | -9.149817  | 4.100445  |
| 138 | C | 12.916991  | -3.833270 | -0.109570 | 191 | H | -8.912183  | -9.428613  | 3.056651  |
| 139 | H | 13.054646  | -3.269383 | -1.046980 | 192 | H | -8.225526  | -10.042146 | 4.554850  |
| 140 | H | 12.948607  | -3.084055 | 0.698881  | 193 | C | -9.985468  | -8.829286  | 4.826391  |
| 141 | C | 14.067618  | -4.812191 | 0.066443  | 194 | H | -10.439206 | -7.933033  | 4.375498  |
| 142 | H | 14.037515  | -5.561887 | -0.741576 | 195 | H | -9.757456  | -8.558093  | 5.868666  |
| 143 | H | 13.925341  | -5.375914 | 1.003406  | 196 | C | -10.976040 | -9.980497  | 4.796585  |
| 144 | C | 15.433334  | -4.143185 | 0.084715  | 197 | H | -11.906013 | -9.737212  | 5.323402  |
| 145 | H | 15.581186  | -3.586652 | -0.855660 | 198 | H | -11.239723 | -10.248386 | 3.764861  |
| 146 | H | 15.458700  | -3.387369 | 0.887304  | 199 | H | -10.553547 | -10.877517 | 5.268357  |
| 147 | C | 16.581506  | -5.121731 | 0.278626  | 200 | C | -1.392781  | 4.391967   | 0.971750  |
| 148 | H | 16.557854  | -5.877303 | -0.524182 | 201 | H | -2.081041  | 4.738320   | 1.759169  |
| 149 | H | 16.430837  | -5.678658 | 1.218376  | 202 | H | -1.650501  | 4.926156   | 0.039975  |
| 150 | C | 17.947592  | -4.453528 | 0.303171  | 203 | C | 0.043597   | 4.635083   | 1.365522  |
| 151 | H | 18.101441  | -3.900963 | -0.638638 | 204 | H | 0.232092   | 4.164516   | 2.341528  |
| 152 | H | 17.968178  | -3.694159 | 1.102569  | 205 | H | 0.701970   | 4.127748   | 0.643122  |
| 153 | C | 19.094834  | -5.430761 | 0.507943  | 206 | C | 0.386789   | 6.114607   | 1.418786  |
| 154 | H | 19.076436  | -6.190890 | -0.290885 | 207 | H | 0.259769   | 6.553077   | 0.413241  |
| 155 | H | 18.941134  | -5.983324 | 1.449905  | 208 | H | -0.323199  | 6.644269   | 2.075373  |
| 156 | C | 20.461316  | -4.762012 | 0.534976  | 209 | C | 1.809599   | 6.363442   | 1.894236  |
| 157 | H | 20.475576  | -4.000638 | 1.330279  | 210 | H | 1.933090   | 5.957445   | 2.911466  |
| 158 | H | 20.614990  | -4.214832 | -0.408033 | 211 | H | 2.505362   | 5.794170   | 1.253222  |
| 159 | C | 21.595181  | -5.750175 | 0.747467  | 212 | C | 2.202102   | 7.831860   | 1.875949  |



|     |   |          |           |          |
|-----|---|----------|-----------|----------|
| 213 | H | 2.026531 | 8.238114  | 0.865202 |
| 214 | H | 1.543299 | 8.402343  | 2.551773 |
| 215 | C | 3.653931 | 8.068603  | 2.258361 |
| 216 | H | 3.838654 | 7.678480  | 3.272850 |
| 217 | H | 4.301707 | 7.478775  | 1.585673 |
| 218 | C | 4.064178 | 9.530959  | 2.192405 |
| 219 | H | 3.426801 | 10.122790 | 2.870175 |
| 220 | H | 3.864211 | 9.918630  | 1.178423 |
| 221 | C | 5.525643 | 9.762435  | 2.542021 |
| 222 | H | 5.731618 | 9.348418  | 3.542951 |
| 223 | H | 6.161539 | 9.189246  | 1.845671 |
| 224 | C | 5.931948 | 11.227360 | 2.509649 |
| 225 | H | 5.298046 | 11.795888 | 3.210153 |
| 226 | H | 5.722090 | 11.644400 | 1.510574 |
| 227 | C | 7.394706 | 11.457286 | 2.855510 |
| 228 | H | 8.031363 | 10.900476 | 2.147714 |
| 229 | H | 7.607509 | 11.029341 | 3.849315 |
| 230 | C | 7.793542 | 12.925450 | 2.844532 |
| 231 | H | 7.157749 | 13.476651 | 3.554473 |
| 232 | H | 7.576499 | 13.351809 | 1.852906 |
| 233 | C | 9.257115 | 13.139870 | 3.188973 |
| 234 | H | 9.911278 | 12.622536 | 2.474779 |
| 235 | H | 9.530892 | 14.201257 | 3.179292 |
| 236 | H | 9.489776 | 12.747203 | 4.187667 |

## References

1. M. Hosoyamada, *et al.*, Translating MOF chemistry into supramolecular chemistry: soluble coordination nanofibers showing efficient photon upconversion. *Chem. Comm.* **54**, 6828–6831 (2018).
2. C. Po, V.W.-W. Yam, A metallo-amphiphile with unusual memory behaviour: effect of temperature and structure on the self-assembly of triethylene glycol (TEG)-pendant platinum(ii) bzimpy complexes. *Chem. Sci.* **5**, 4868–4872 (2014).
3. K.W. Bentley, Z.A.d.l. Santos, M.J. Weiss, C. Wolf, Chirality sensing with stereodynamic biphenolate Zinc complexes. *Chirality* **27**, 700–707 (2015).
4. Y. Chen, *et al.*, Photoresponsive supramolecular organometallic nanosheets induced by Pt(II)···Pt(II) and C-H··· $\pi$  interactions. *Angew. Chem. Int. Ed.* **48**, 9909–9913 (2009).
5. Y. Ai, *et al.*, Cyclometalated platinum(II) complexes of 1,3-bis(1-*n*-butylpyrazol-3-yl)benzenes: synthesis, characterization, electrochemical, photophysical, and gelation behavior studies. *Inorg. Chem.* **55**, 11920–11929 (2016).
6. S. Fuse, S. Sugiyama, T. Takahashi, Rapid assembly of resorcylic acid lactone frameworks through sequential palladium-catalyzed coupling reactions. *Chem. Asian J.* **5**, 2459–2462 (2010).
7. Y. Ai, *et al.*, Solvent-induced and temperature-promoted aggregation of bipyridine platinum(II) triangular metallacycles and their near-infrared emissive behaviors. *Chem. Eur. J.* **24**, 11611–11618 (2018).
8. G. Zhang, *et al.*, Direct observation of reduction of Cu(II) to Cu(I) by terminal alkynes. *J. Am. Chem. Soc.* **136**, 924–926 (2014).
9. K. Chen, *et al.*, Computer-assisted design of ionic liquids for efficient synthesis of 3(2H)-furanones: a domino reaction triggered by CO<sub>2</sub>. *J. Am. Chem. Soc.* **138**, 14198–14201 (2016).
10. L. Murphy, *et al.*, Blue-shifting the monomer and excimer phosphorescence of tridentate cyclometallated platinum(II) complexes for optimal white-light OLEDs. *Chem. Comm.* **48**, 5817–5819 (2012).
11. O.V. Dolomanov, *et al.*, OLEX2: a complete structure solution, refinement and analysis program. *J. Appl. Cryst.* **42**, 339–341 (2009).
12. G.M. Sheldrick, A short history of SHELX. *Acta. Cryst.* **A64**, 112–122 (2008).
13. M.J. Frisch, *et al.*, *Gaussian 09* Revision D.01 Ed. (Gaussian, Inc., 2013).
14. Y. Zhao, D.G. Truhlar, The M06 suite of density functionals for main group thermochemistry, thermochemical kinetics, noncovalent interactions, excited states, and transition elements: two new functionals and systematic testing of four M06-class functionals and 12 other functionals. *Theor. Chem. Acc.* **120**, 215–241 (2008).
15. Y. Zhao D.G. Truhlar, Density functionals with broad applicability in chemistry. *Acc. Chem. Res.* **41**, 157–167 (2008).
16. A.V. Marenich, C.J. Cramer, D.G. Truhlar, Universal solvation model based on solute electron density and on a continuum model of the solvent defined by the

- bulk dielectric constant and atomic surface tensions. *J. Phy. Chem. B* **113**, 6378–6396 (2009).
17. D. Andrae, *et al.*, Energy-adjusted ab initio pseudopotentials for the second and third row transition elements. *Theor. Chim. Acta.* **77**, 123–141 (1990).
  18. M. Dolg, P. Pykkö, N. Runeberg, Calculated structure and optical properties of  $Tl_2Pt(CN)_4$ . *Inorg Chem* **35**, 7450–7451 (1996).
  19. W.J. Hehre, R. Ditchfield, J.A. Pople, Self-consistent molecular orbital methods. XII. further extensions of Gaussian-type basis sets for use in molecular orbital studies of organic molecules. *J. Chem. Phy.* **56**, 2257–2261 (1972).
  20. J.D. Dill, J.A. Pople, Self-consistent molecular orbital methods. XV. Extended Gaussian-type basis sets for lithium, beryllium, and boron. *J. Chem. Phy.* **62**, 2921–2923 (1975).
  21. P.C. Hariharan, J.A. Pople, The influence of polarization functions on molecular orbital hydrogenation energies. *Theor. Chim. Acta.* **28**, 213–222 (1973).
  22. M.M. Francl, *et al.*, Self-consistent molecular orbital methods. XXIII. A polarization-type basis set for second-row elements. *J. Chem. Phy.* **77**, 3654–3665 (1982).
